# Supplementary material for: Phytochemical Compound Screening to Identify Novel Small Molecules against Dengue Virus: A Docking and Dynamics Study
Source: MDPI journal article supplement (doi:10.3390/molecules27030653), 2022-01-20
Supplement: s1 [file s1]

*Supplementary Materials*

# Phytochemical Compound Screening to Identify Novel Small Molecules Against Dengue Virus: A Docking and Dynamics Study

Mst. Sharmin Sultana Shimu <sup>1,†</sup>, Shafi Mahmud <sup>2,†</sup>, Trina Ekwati Tallei <sup>3</sup>, Saad Ahmed Sami <sup>4</sup>, Ahmad Akroman Adam <sup>5</sup>, Uzzal Kumar Acharjee <sup>1,\*</sup>, Gobindo Kumar Paul <sup>2</sup>, Talha Bin Emran <sup>6</sup>, Shahriar Zaman <sup>2</sup>, Md. Salah Uddin <sup>2</sup>, Md. Abu Saleh <sup>2,\*</sup>, Sultan Alshehri <sup>7</sup>, Mohammed M Ghoneim <sup>8</sup>, Maha Alruwali <sup>8</sup>, Ahmad J. Obaidullah <sup>9,10</sup>, Nabilah Rahman Jui <sup>11</sup>, Junghwan Kim <sup>12</sup>, and Bonglee Kim <sup>13</sup>

<sup>1</sup> Genetic Engineering and Biotechnology, University of Rajshahi, Rajshahi-6205, Bangladesh; sharminshimu120@gmail.com.

<sup>2</sup> Microbiology Laboratory, Genetic Engineering and Biotechnology, University of Rajshahi, Rajshahi-6205, Bangladesh; shafimahmudfz@gmail.com (S.M.); gobindokumar38@gmail.com (G.K.P.); szaman@ru.ac.bd (S.Z.); salim.geb@ru.ac.bd (M.S.U.);

<sup>3</sup> Department of Biology, Faculty of Mathematics and Natural Science, Sam Ratulangi University, Manado, North Sulawesi 95115, Indonesia; trina\_tallei@unsrat.ac.id

<sup>4</sup> Department of Pharmacy, University of Chittagong, Chittagong, Bangladesh; s.a.sami18pharm@gmail.com

<sup>5</sup> Dentistry Study Program, Faculty of Medicine, Sam Ratulangi University, Indonesia; ahmad\_adam@ymail.com

<sup>6</sup> Department of Pharmacy, BGC Trust University, Chittagong, Bangladesh; talhabmb@bgctub.ac.bd

<sup>7</sup> Department of Pharmaceutics, College of Pharmacy, King Saud University, Riyadh 11451, Saudi Arabia

<sup>8</sup> Department of Pharmacy Practice, College of Pharmacy, AlMaarefa University, Ad Diriyah 13713, Saudi Arabia

<sup>9</sup> Drug Exploration and Development Chair (DEDC), Department of Pharmaceutical Chemistry, College of Pharmacy, King Saud University, Riyadh 11451, Saudi Arabia.

<sup>10</sup> Department of Pharmaceutical Chemistry, College of Pharmacy, King Saud University, Riyadh 11451, Saudi Arabia

<sup>11</sup> Department of Biochemistry and Biotechnology, University of Science and Technology Chittagong, Bangladesh

<sup>12</sup> Department of Internal Medicine, College of Korean Medicine, Kyung Hee University, Seoul, 02447, Republic of Korea; akom21@khu.ac.kr (J.K.)

<sup>13</sup> Department of Pathology, College of Korean Medicine, Kyung Hee University, Hoegidong Dongdaemungu, Seoul, 05253, Republic of Korea. bongleekim@khu.ac.kr (B.K.)

† These authors contributed equally to this work.

\* Correspondence: ukarcc@gmail.com (U.K.A.); saleh@ru.ac.bd (M.A.S.); bongleekim@khu.ac.kr (B.K.)

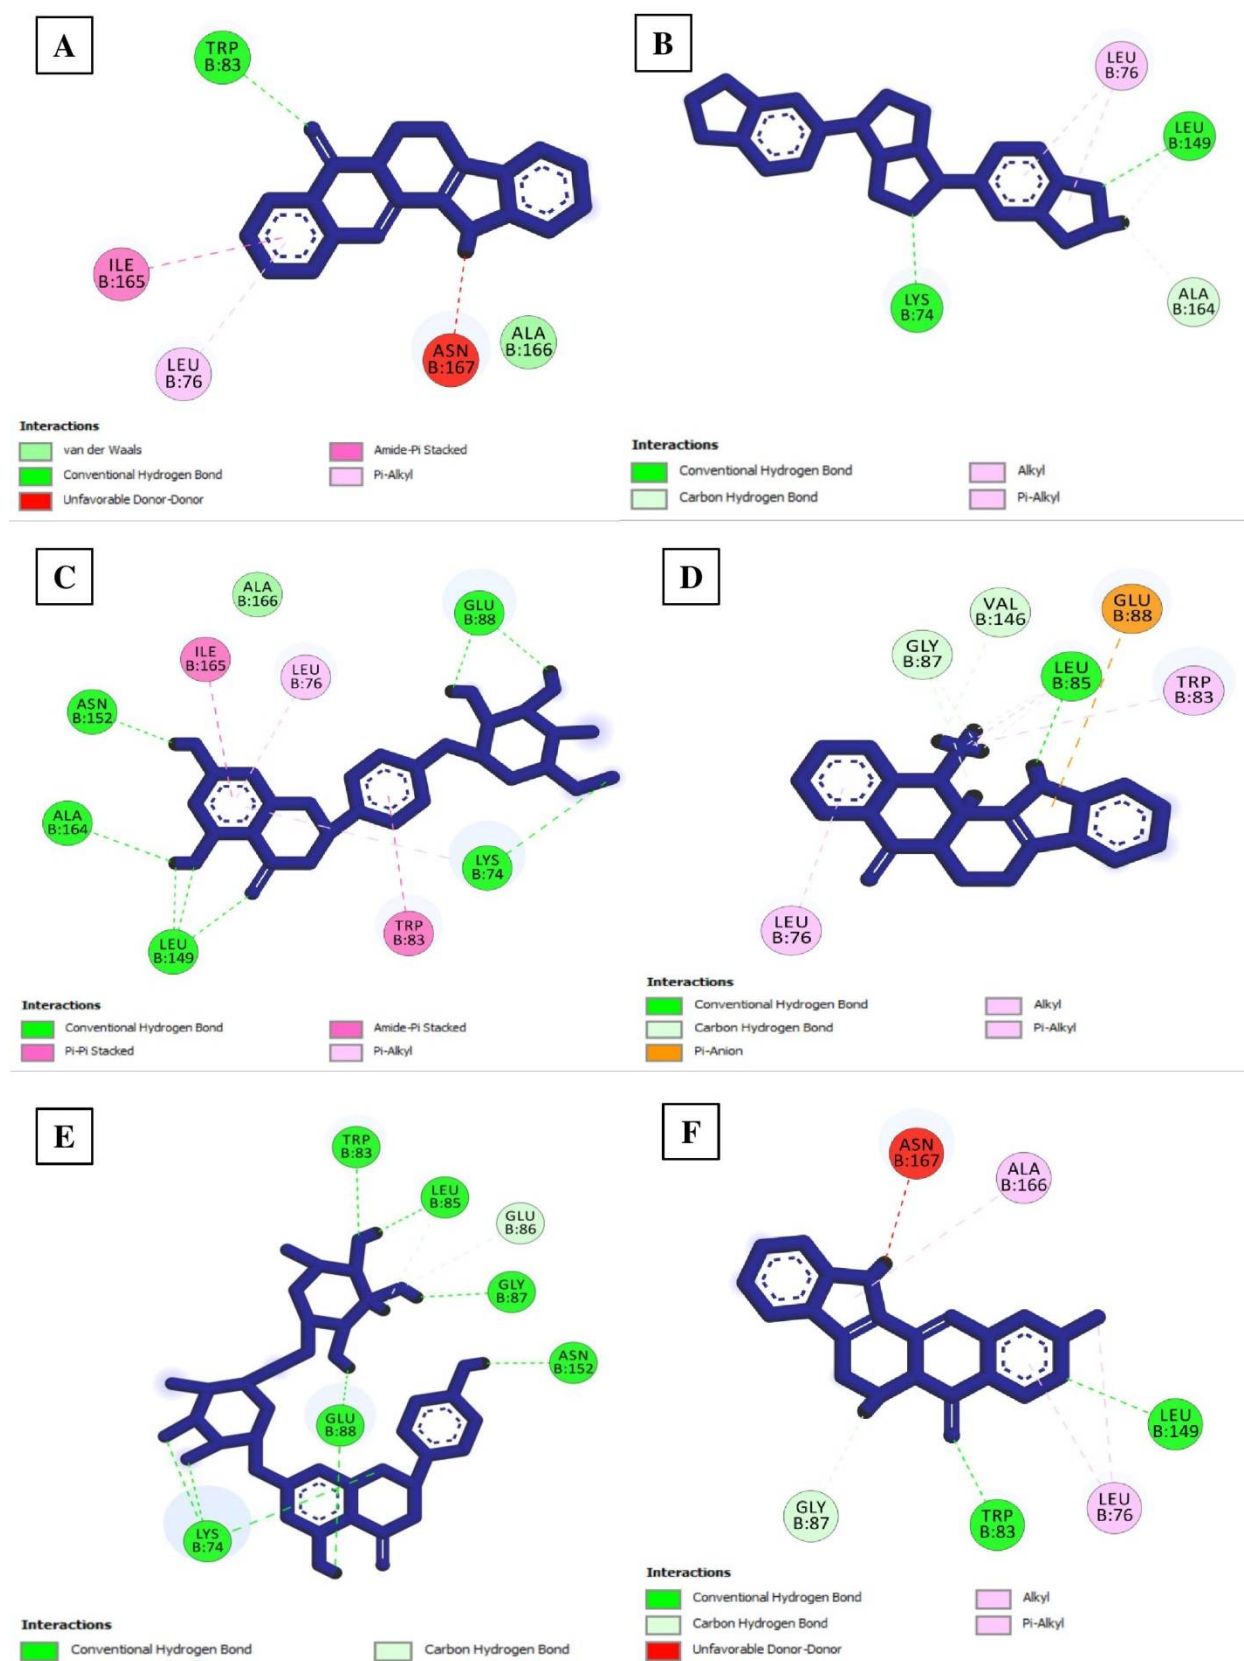

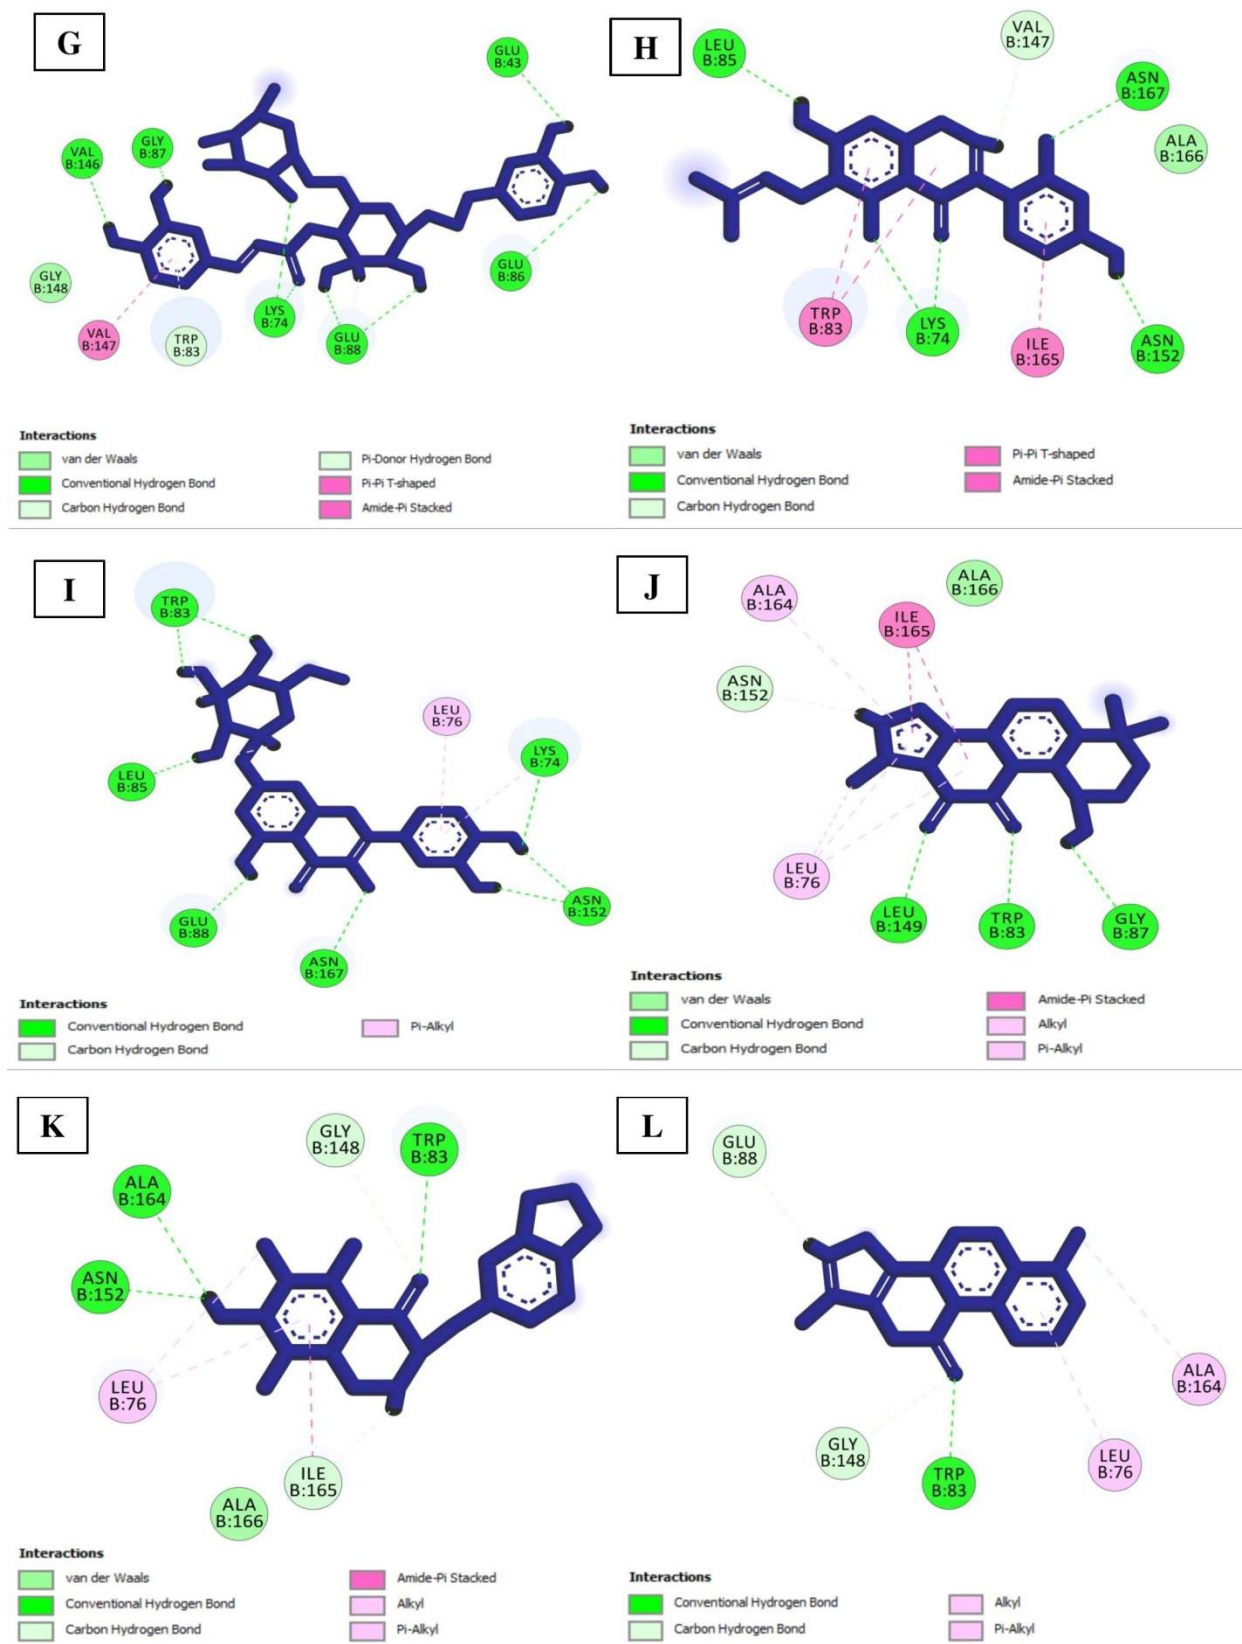

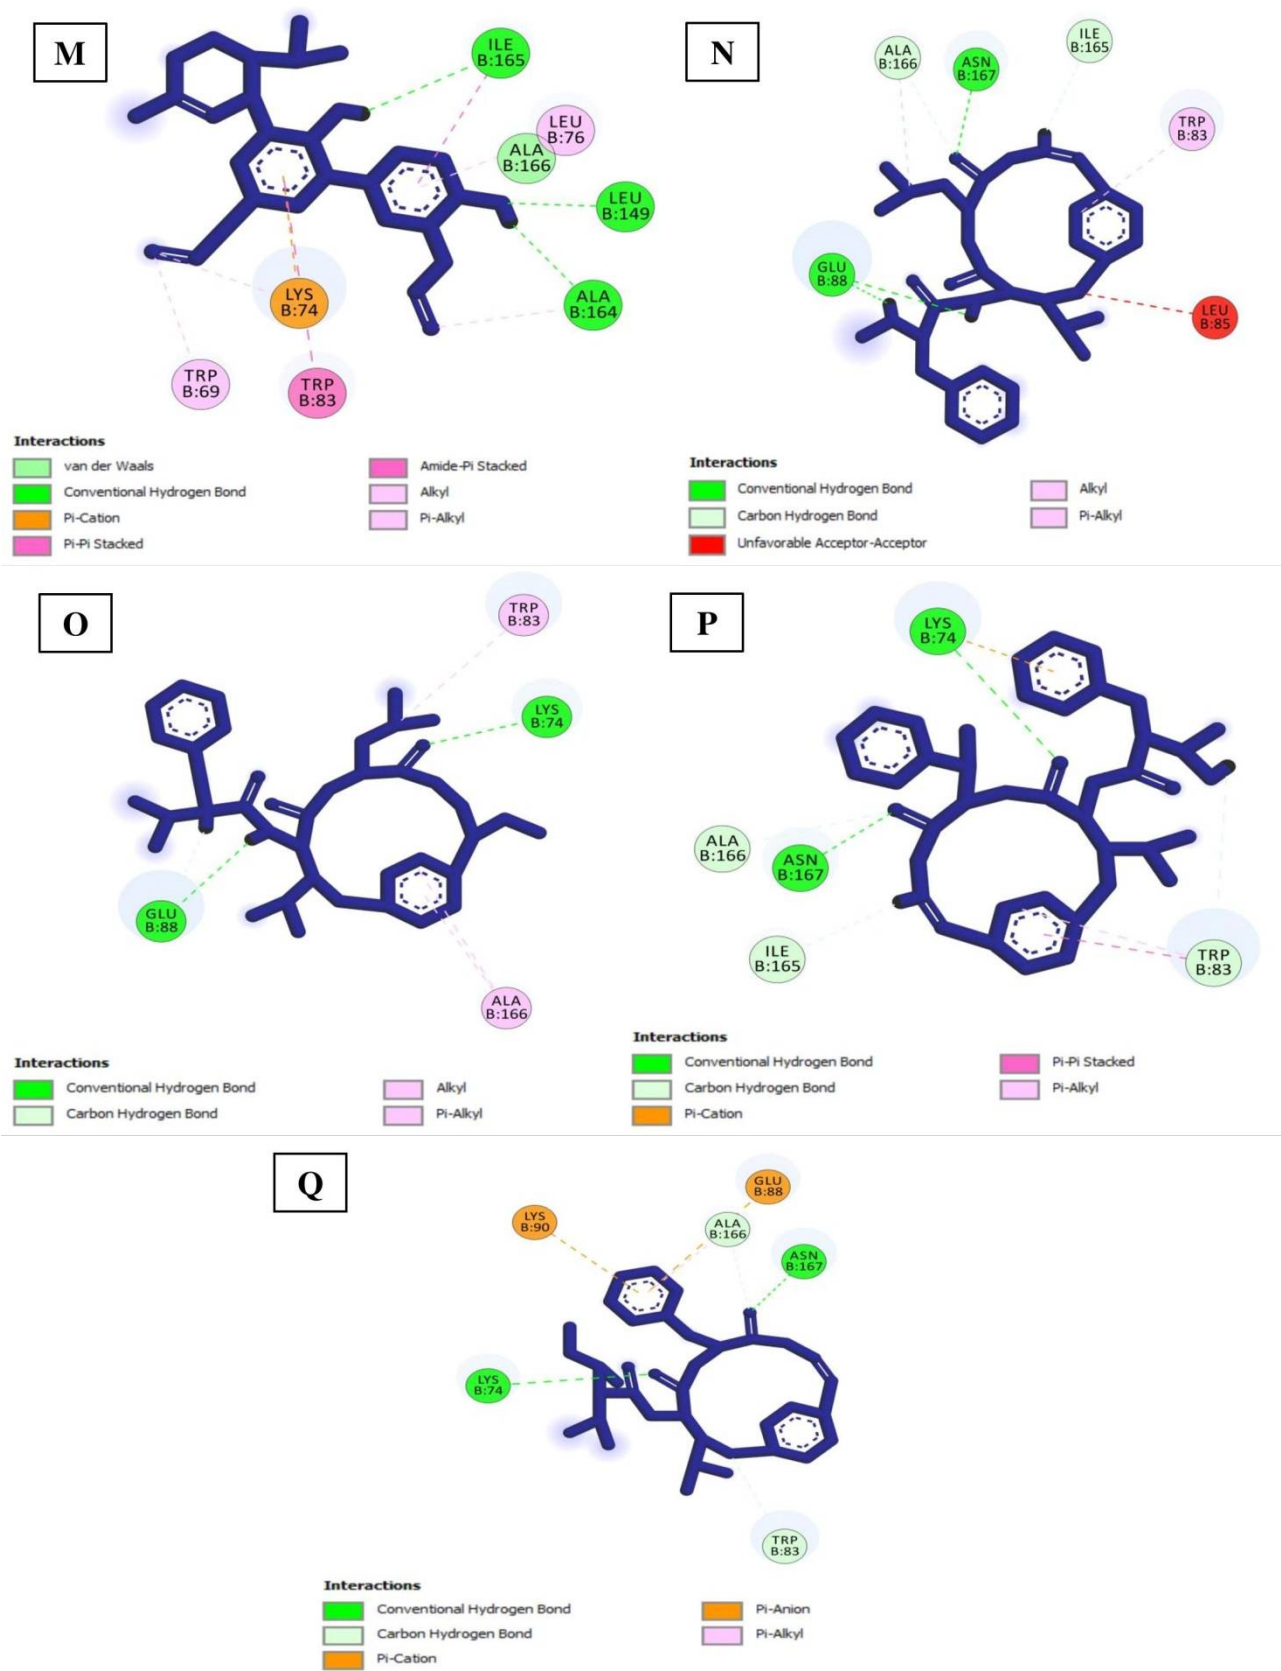



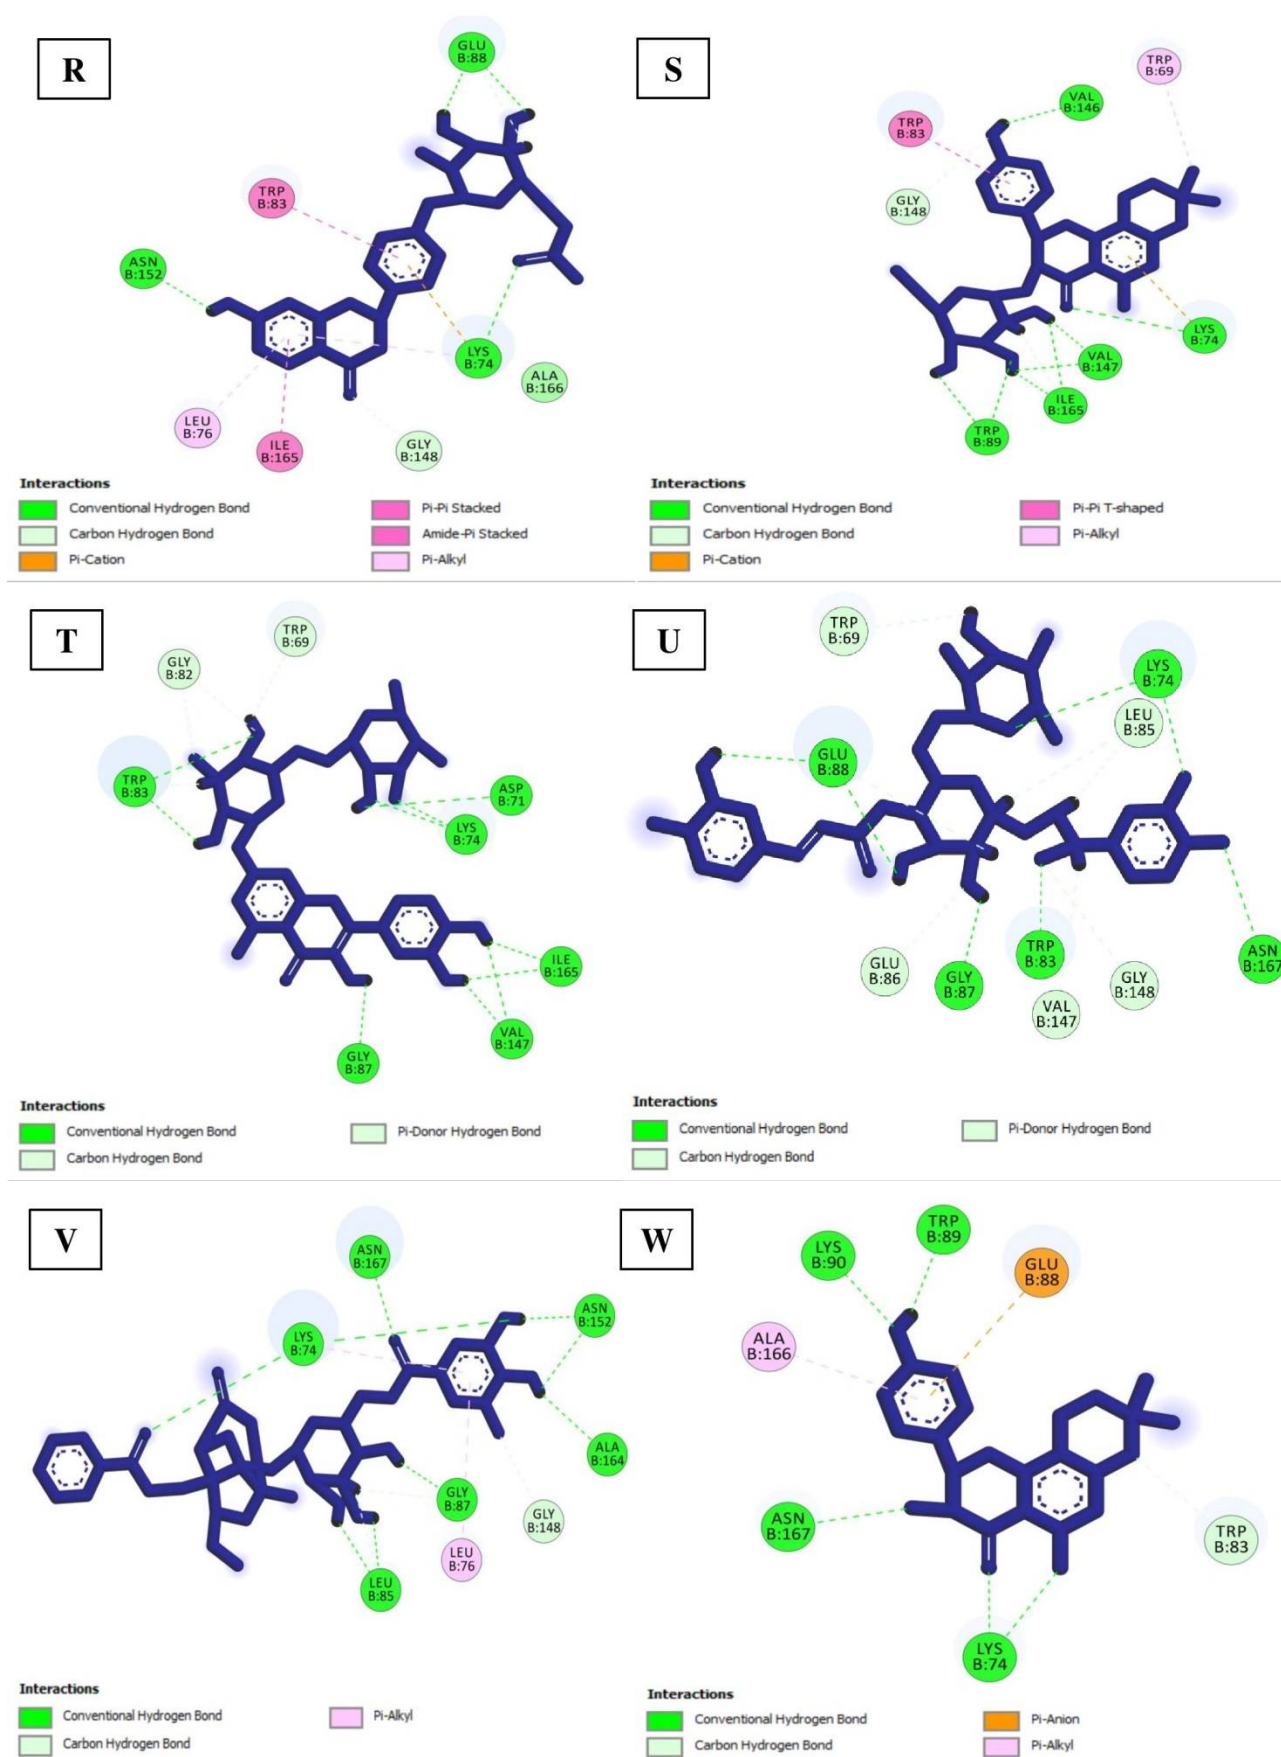

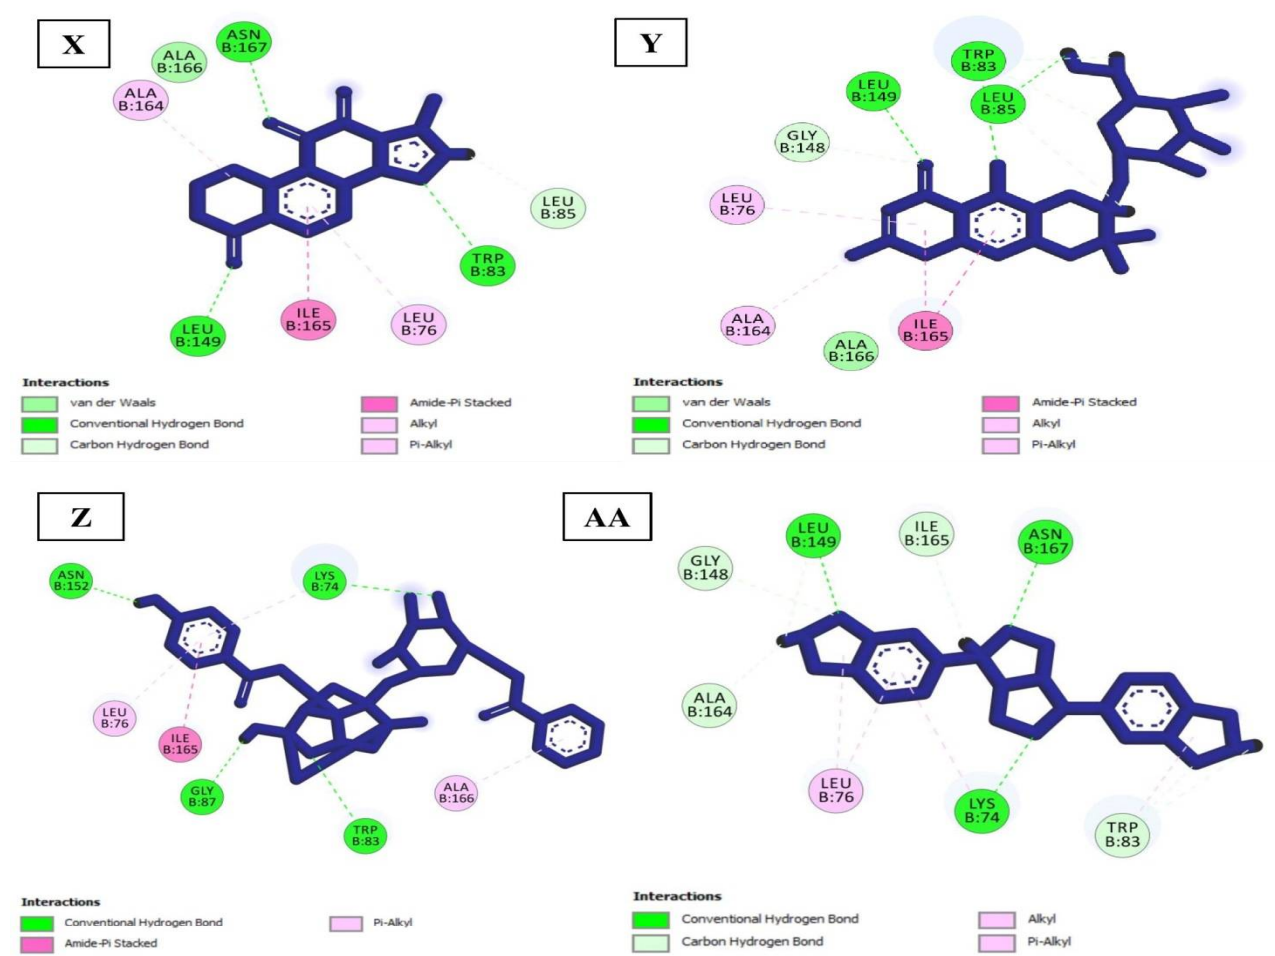

**Figure S1.** 2D representation of the selected compounds against Dengue Virus NS2B/NS3 Protease (PDB: 2FOM). (A) Rutaecarpine, (B) Sesamin, (C) Choerospondin, (D) Evodiamine, (E) Narirutin, (F) Angustidine, (G) Forsythoside A, (H) Luteone, (I) Quercimeritrin, (J) Hydroxytanshinone, (K) Methylophiopogonanone A, (L) Tanshinlactone, (M) Piperitylthonokiol, (N) Sanjoinine B, (O) Sanjoinine D, (P) Scutianine D, (Q) Scutianine C, (R) 6''-O-Acetyllicquiritin, (S) Phellodendroside, (T) Quercetin-7-O-Rutinoside, (U) (S)-Suspensaside, (V) Paeonidanin B, (W) Phellamuretin, (X) Nortanshinone, (Y) Sec-O-Glucosylhamaudol, (Z) Benzoyloxypaeoniflorin, and (AA) Asarinin.

**Table S1.** Selected plants, their compounds and CID of each compound.

| no | Name                     | Compounds                               | CID      | Reference |
|----|--------------------------|-----------------------------------------|----------|-----------|
| 1. | Asarum sieboldii<br>(45) | Methylpluviatilol                       | 5320622  |           |
|    |                          | Pluviatilol                             | 70695727 |           |
|    |                          | Epipinoresinol                          | 637584   |           |
|    |                          | Sesamin                                 | 72307    |           |
|    |                          | Piperitol                               | 10247670 |           |
|    |                          | Methyleugenol                           | 7127     |           |
|    |                          | (±)-car-3-ene-2,5-dione                 | 181910   |           |
|    |                          | -N-isobutyl-2,4,8,10-dodecatetraenamide | 57404464 |           |
|    |                          | Myristicin                              | 4276     |           |
|    |                          | Safrole                                 | 5144     |           |
|    |                          | Asarinol A                              | 46174001 |           |
|    |                          | Asarinol B                              | 46174002 |           |
|    |                          | Asarinol C                              | 21631051 |           |
|    |                          | (+)-Asarinol D                          | 21631052 |           |
|    |                          | 3-Caren-2-one                           | 13901618 |           |
|    |                          | m-Cymene                                | 10812    |           |
|    |                          | p-Cymene                                | 7463     |           |
|    |                          | p-Cymen-7-ol                            | 325      | 1         |
|    |                          | 2,3-Dehydro-1,8-cineol                  | 523035   | 1         |
|    |                          | Fenchone                                | 14525    | 1         |
|    |                          | Myrcenol                                | 10975    | 1         |
|    |                          | Phellandral                             | 89488    | 1         |
|    |                          | Sabinyol acetate                        | 94266    | 1         |
|    |                          | Terpinen-4-yl acetate                   | 20960    | 1         |
|    |                          | Calarene                                | 28481    | 1         |
|    |                          | Alpha-Guaiene                           | 5317844  | 2         |
|    |                          | Beta-Guaiene                            | 6949     | 2         |
|    |                          | Isoledene                               | 530426   | 3         |
|    |                          | Sativene                                | 11830550 |           |
|    |                          | 3',4'-Dimethoxycinnamaldehyde           | 5375268  |           |
|    |                          | 3,5-Dimethoxytoluene                    | 77844    |           |
|    |                          | 2,3,5-Trimethoxytoluene                 | 170114   |           |
|    |                          | Asaricin                                | 4276     |           |
|    |                          | Alpha-Asarone                           | 636822   |           |
|    |                          | Beta-Asarone                            | 5281758  |           |
|    |                          | Croweacin                               | 5316141  |           |
|    |                          | Elemicin                                | 10248    |           |
|    |                          | (E)-Isocroweacin                        | 14601153 |           |
|    |                          | Methyl kakuol                           | 13672435 |           |
|    |                          | 3,4-Methylene-dioxypropiofenone         | 95682    |           |
|    |                          | Asarinin                                | 11869417 |           |
|    |                          | Asatone                                 | 431129   |           |
|    |                          | Tetradecane                             | 12389    |           |
|    |                          | 1-Tridecene                             | 17095    |           |
| 2. | Scutellaria baicalensis  | Acetophenone                            | 7410     | 4         |
|    |                          | l-phenyl-1                              | 11062753 |           |

|    |                   |                                         |           |   |
|----|-------------------|-----------------------------------------|-----------|---|
| 3. | (30)              | (E)-4-phenyl-3-buten-2-one              | 129825247 | 5 |
|    |                   | 3-butanedione                           | 6409633   |   |
|    |                   | palmitic acid                           | 985       |   |
|    |                   | oleic acid                              | 445639    |   |
|    |                   | b-carotene                              | 5280489   |   |
|    |                   | benzyl alcohol                          | 244       |   |
|    |                   | b-sitosterol                            | 222284    |   |
|    |                   | Benzoic acid                            | 243       |   |
|    |                   | Lutein                                  | 5281243   |   |
|    |                   | Baicalin                                | 64982     |   |
|    |                   | Baicalein                               | 5281605   |   |
|    |                   | Wogonoside                              | 3084961   |   |
|    |                   | Wogonin                                 | 5281703   |   |
|    |                   | Tenaxin-I                               | 159029    |   |
|    |                   | Viscidulin III                          | 5271991   |   |
|    |                   | Viscidulin I                            | 5320471   |   |
|    |                   | Viscidulin II                           | 5322059   |   |
|    |                   | Baicalein-7-O-D-glucoside               | 5320313   |   |
|    |                   | Norwogonin                              | 5281674   |   |
|    |                   | Chrysin                                 | 5281607   |   |
|    |                   | Chrysin-8-C- $\beta$ -D-glucopyranoside | 44257620  |   |
|    |                   | Skullcapflavone II                      | 124211    |   |
|    |                   | Salvigenin                              | 161271    |   |
|    |                   | Oroxylin A                              | 5320315   |   |
|    |                   | Oroxylin A-7-O-glucuronide              | 14655551  |   |
|    |                   | Eriodictyol                             | 440735    |   |
|    |                   | 5-Hydroxy-7,8-dimethoxyflavone          | 188316    |   |
|    |                   | Dihydrobaicalin                         | 14135325  |   |
|    |                   | Dihydrooroxylin A                       | 5316733   |   |
|    |                   | Eriodictyol                             | 440735    |   |
|    | Cinnamomum cassia | endo-borneol                            | 1201518   |   |
|    |                   | (-)- $\alpha$ -terpineol                | 443162    |   |
|    |                   | $\beta$ -bisabolene                     | 10104370  |   |
|    |                   | $\alpha$ -bisabolol                     | 1616126   |   |
|    |                   | curcumene                               | 92139     |   |
|    |                   | $\delta$ -cadinene                      | 12306054  |   |
|    |                   | espatulenol                             | 522266    |   |
|    |                   | caryophyllene oxide                     | 1742210   |   |
|    |                   | $\alpha$ -muurolene                     | 12306049  |   |
|    |                   | $\alpha$ -cadinol                       | 6431302   |   |
|    |                   | coniferaldehyde                         | 5280536   |   |
|    |                   | cinnamylalcohol                         | 5315892   |   |
|    |                   | 2-methoxycinnamaldehyde                 | 641298    |   |
|    |                   | 20-methoxycinnamaldehyde                | 641298    |   |
|    |                   | benzyl benzoate                         | 2345      |   |
|    |                   | 2-hydroxybenzaldehyde                   | 6998      |   |
|    |                   | 3-phenylpropanol                        | 31234     |   |
|    |                   | Benzaldehyde                            | 240       |   |
|    |                   | phenylethyl alcohol                     | 6054      |   |
|    |                   | benzenepropanal                         | 7707      |   |



|                                            |           |    |
|--------------------------------------------|-----------|----|
| 1-terpineol                                | 11468     | 6  |
| cis- $\beta$ -terpineol                    | 8748      | 6  |
| caryophyllene                              | 5281515   | 6  |
| eugenol                                    | 3314      | 6  |
| cinnamyl acetate                           | 5282110   | 6  |
| linalool                                   | 6549      | 7  |
| camphene                                   | 6616      | 7  |
| $\beta$ -pinene                            | 440967    | 7  |
| camphor                                    | 2537      | 7  |
| geranyl acetate                            | 1549026   | 7  |
| copaene                                    | 19725     | 7  |
| 1-(1,5-dimethyl-4-hexenyl)-4-methylbenzene | 92139     | 7  |
| Cedrene                                    | 521207    | 7  |
| $\alpha$ -calacorene                       | 528708    | 7  |
| isolekene                                  | 530426    | 7  |
| cis-cinnamaldehyde                         | 6428995   | 7  |
| trans-cinnamaldehyde                       | 637511    | 7  |
| ethyl cinnamate                            | 637758    | 7  |
| benzene,1,3-dimethyl                       | 7929      | 7  |
| styrene                                    | 7501      | 7  |
| 1,3-pentanediol,2,2,4-trimethyl            | 71330332  | 7  |
| Decanal                                    | 8175      | 7  |
| dodecane, 2,6,10-trimethyl                 | 6430052   | 7  |
| coumarin                                   | 323       | 7  |
| cinnzeylanol                               | 44559448  | 8  |
| anhydrocinnzeylanol                        | 73099741  | 8  |
| cinnzeylanone                              | 101693755 | 8  |
| Anhydrocinnzeylanine                       | 131752069 | 8  |
| cinnassiol A                               | 46173967  | 9  |
| cinnassiol B                               | 71448932  | 9  |
| cinnassiol C                               | 75144796  | 9  |
| cinnassiol E                               | 139031772 | 9  |
| cinnacasol                                 | 102421920 | 9  |
| perseanol                                  | 21672106  | 10 |
| cinnassiol D1                              | 139031768 | 10 |
| D1 glucoside                               | 131751606 | 10 |
| D2 glucoside                               | 131751607 | 10 |
| D4 glucoside                               | 131751659 | 10 |
| trans-caryophyllene                        | 5281515   | 11 |
| germacrene D                               | 5317570   | 11 |
| cinnamaldehyde                             | 637511    | 11 |
| cis-2-methoxycinnamic acid                 | 1622530   | 11 |
| o-methoxycinnamaldehyde                    | 641298    | 11 |
| 2,2,4,6,6-pentamethylheptane               | 26058     | 11 |
| 2,5,9-trimethyldecane                      | 522020    | 11 |
| 2-ethyl-5-propylphenol                     | 522454    | 11 |
| 3,4-dimethoxyphenethyl alcohol             | 81911     | 11 |
| 2,5-dimethylundecane                       | 28452     | 11 |
| 2-hydroxycinnamic acid                     | 637540    | 12 |
| 2-hydroxycinnamaldehyde                    | 5318169   | 12 |

|    |                                            |           |    |
|----|--------------------------------------------|-----------|----|
|    | 4-methoxycinnamaldehyde                    | 641294    | 12 |
|    | cinnamic acid                              | 444539    | 12 |
|    | cinnacasolide A                            | 70692598  | 13 |
|    | cinnacasolide B                            | 70692599  | 13 |
|    | cinnacasolide C                            | 70694646  | 13 |
|    | rosavin                                    | 9823887   | 13 |
|    | dihydromelilotoside                        | 5316728   | 13 |
|    | methyl dihydromelilotoside                 | 46881368  | 13 |
|    | cinnacasside A                             | 25214691  | 14 |
|    | cinnacasside C                             | 25214689  | 14 |
|    | cinnacasside B                             | 102035893 | 15 |
|    | picrasmalignan A                           | 122395445 | 16 |
|    | (-)-syringaresinol                         | 11604108  | 16 |
|    | (+)-isolariciresinol                       | 160521    | 16 |
|    | (-)-secoisolariciresinol                   | 65373     | 16 |
|    | Lawsonicin                                 | 70698092  | 16 |
|    | 5-methoxylariciresinol                     | 44559567  | 16 |
|    | (+)-5,5 -dimethoxylariciresinol            | 14157882  | 16 |
|    | (1→6)-β-d-glucopyranoside                  | 476541    | 17 |
|    | (-)-lyoniresinol 3α-O-β-d-glucopyranoside  | 10483388  | 17 |
|    | 5R-methyl-3-heptatriacontyl-2(5H)-furanone | 129882098 | 18 |
|    | Echinatin                                  | 6442675   |    |
|    | Glycyrin                                   | 480787    |    |
|    | Glycyrol                                   | 5320083   |    |
|    | Isoangustone A                             | 21591148  |    |
|    | Isoglycyrol                                | 124050    |    |
|    | 7-O-methyluteone                           | 441251    |    |
|    | Glyasperin D                               | 480860    |    |
|    | Dehydroglyasperin D                        | 10109594  |    |
|    | Gancaonin I                                | 480777    |    |
|    | Semilicoisoflavone B                       | 5481948   |    |
| 4. | Kumatakenin                                | 5318869   | 19 |
|    | Licoricone                                 | 5319013   |    |
|    | Angustone A                                | 15664151  |    |
|    | Licoflavonol                               | 5481964   |    |
|    | Topazolin                                  | 5481965   |    |
|    | Licoisoflavone A                           | 5281789   |    |
|    | Wighteone                                  | 5281814   |    |
|    | Allolicoisoflavone B                       | 10383349  |    |
|    | Lupiwighteone                              | 5317480   |    |
|    | Licoarylcoumarin                           | 10090416  |    |
|    | Isolicoflavonol                            | 5318585   |    |
|    | Formononetin                               | 5280378   |    |
|    | Genkwanin                                  | 5281617   |    |
|    | Glycy coumarin                             | 5317756   |    |
|    | Isoglabrone                                | 102597283 | 19 |
|    | Glyurallin A                               | 15818598  |    |
|    | 11b-hydroxy-11b,1-dihydromedicarpin        | 44437741  |    |
|    | Kaempferol 3-O-methyl ether                | 5280862   |    |
|    | Glycyrrhiza-isoflavone C                   | 10546844  |    |

|                                             |           |    |
|---------------------------------------------|-----------|----|
| Isoliquiritigenin                           | 638278    |    |
| Isoglycycoumarin                            | 14187587  |    |
| Genistein                                   | 5280961   |    |
| Kumatakenin B                               | 5318869   |    |
| Luteone                                     | 5281797   |    |
| Licocoumarone                               | 503731    |    |
| Uralenol                                    | 5315126   |    |
| Glicoricone                                 | 10361658  |    |
| Pratensein                                  | 5281803   |    |
| Dehydroglyasperin C                         | 480775    |    |
| Homobutein                                  | 6438092   |    |
| Kaempferol                                  | 5280863   |    |
| Gancaonin L                                 | 14604077  |    |
| Licoisoflavanone                            | 392443    | 19 |
| biochanin A                                 | 5280373   |    |
| Liquiritigenin                              | 114829    |    |
| Licoflavone A                               | 5319000   |    |
| Glyasperin C                                | 480859    |    |
| Daidzein                                    | 5281708   |    |
| 1-methoxyphaseollin                         | 10247433  |    |
| Isolupalbigenin                             | 26238934  |    |
| 6,8-diprenylgenistein                       | 480783    |    |
| 2'-hydroxyisolupalbigenin                   | 14237659  |    |
| Isoderrone                                  | 14237660  |    |
| Licoricidin                                 | 480865    |    |
| Glicophenone                                | 10021298  |    |
| Licoisoflavone B                            | 5481234   |    |
| Vicenin-2                                   | 442664    |    |
| Isoviolanthin                               | 101422758 |    |
| Liquiritin apioside                         | 10076238  |    |
| Liquiritin                                  | 503737    |    |
| Ononin                                      | 442813    |    |
| Isoliquiritin                               | 5318591   |    |
| Glycyroside                                 | 101939210 |    |
| Sophoraflavone B                            | 5491513   |    |
| Daidzin                                     | 107971    |    |
| Glycyrrhizic acid                           | 14982     | 20 |
| lignoceric acid                             | 11197     | 20 |
| methoxyfolicifolinol                        | 480872    | 20 |
| docosanol                                   | 12620     | 20 |
| betulinic acid                              | 64971     | 20 |
| docosyl caffeate                            | 5316952   | 20 |
| neoglycyrol                                 | 5320083   | 20 |
| gancaonin H                                 | 5481949   | 20 |
| 3R-vestitol                                 | 439310    | 20 |
| Licoarylcoumarin                            | 10090416  | 20 |
| 7,2',4'-trihydroxy-5-methoxy-3-arylcoumarin | 25015742  | 20 |
| Isoliquiritigenin                           | 638278    | 20 |
| Glycyrin                                    | 480787    | 20 |
| isoliquiritin apioside                      | 6442433   | 20 |

|    |                         |                                         |           |    |
|----|-------------------------|-----------------------------------------|-----------|----|
|    |                         | hedysarimcoumestan B                    | 11558452  | 20 |
|    |                         | AH-1                                    | 132525571 |    |
|    |                         | astragaloside I                         | 13996685  |    |
|    |                         | Astragaloside-II                        | 71306915  |    |
|    |                         | Astragaloside III                       | 441905    |    |
|    |                         | Astragaloside IV                        | 13943297  |    |
|    |                         | Astragaloside V                         | 71448939  |    |
|    |                         | Astragaloside VI                        | 71448940  |    |
|    |                         | Astragaloside VII                       | 14241100  |    |
|    |                         | Isoastragaloside I                      | 60148697  |    |
|    |                         | Isoastragaloside II                     | 60148655  |    |
|    |                         | Azukisaponin V methyl ester             | 101683319 |    |
|    |                         | Malonylastragaloside                    | 50917280  |    |
|    |                         | astramembrannin II                      | 132492418 |    |
| 5. | Astragalus membranaceus | brachyoside B                           | 100927164 |    |
|    | (30)                    | cyclocanthoside E                       | 21633193  | 21 |
|    |                         | astramembranoside A                     | 24795974  |    |
|    |                         | astramembranoside B                     | 24796110  |    |
|    |                         | Astragalan                              | 103026223 |    |
|    |                         | Kaempferol                              | 5280863   |    |
|    |                         | Isorhamnetin                            | 5281654   |    |
|    |                         | Rhamnocitrin                            | 5320946   |    |
|    |                         | kumatakenin                             | 5318869   |    |
|    |                         | rhamnocitrin-3-glucoside                | 44259544  |    |
|    |                         | quercetin-3-glucoside                   | 5280804   |    |
|    |                         | Formononetin                            | 5280378   |    |
|    |                         | Calycosin                               | 5280448   |    |
|    |                         | 2'-hydroxy-3',4',7-trimethoxyisoflavone | 44257240  |    |
|    |                         | 3,9,10-trimethoxypterocarpan            | 15689655  |    |
|    |                         | Astragalus polysaccharides (APS)        | 2782115   |    |
|    |                         | Berberine                               | 2353      |    |
|    |                         | Berberrubine                            | 72703     |    |
|    |                         | Berberastine                            | 442180    |    |
|    |                         | Bis-[4-(dimethylamino)phenyl]methanone  | 282874    |    |
|    |                         | Evodiamine                              | 442088    |    |
|    |                         | Palmatine                               | 19009     |    |
|    |                         | Tetrahydropalmatine                     | 5417      |    |
|    |                         | Tetrahydroberberine                     | 34458     |    |
| 6. | Phellodendron amurense  | Phellodendrine                          | 3081405   | 22 |
|    | (70)                    | Magnocurarine                           | 53266     |    |
|    |                         | Magnoflorine                            | 73337     |    |
|    |                         | Y-Fagarine                              | 107936    |    |
|    |                         | Canthin-6-one                           | 97176     |    |
|    |                         | 4-methoxy-N-methyl-2-quinolone          | 182073    |    |
|    |                         | Oxypalmatine                            | 10926678  |    |
|    |                         | Candicine                               | 23135     |    |
|    |                         | Lotusine                                | 5274587   |    |
|    |                         | (-)-Oblongine                           | 157128    |    |
|    |                         | Tetrahydrojatrorrhizine                 | 185605    | 22 |
|    |                         | Menisperine                             | 161487    |    |

|                              |           |
|------------------------------|-----------|
| (+) N-methylcorydine         | 52949574  |
| N-methylflindersine          | 72819     |
| Litcubine                    | 85243417  |
| Tetrahydropalmatine          | 5417      |
| Xanthoplanine                | 14262868  |
| N-methylphoebine             | 101731569 |
| Columbamine                  | 72310     |
| Epiberberine                 | 160876    |
| Pteleine                     | 159650    |
| Noroxyhydrastinine           | 89047     |
| Chilenine                    | 11025386  |
| Rutecarpine                  | 65752     |
| Skimmianine                  | 6760      |
| Tembetarine                  | 167718    |
| Tetramethyl-O-scutellarin    | 96118     |
| γ-hydroxybutenolide          | 16221764  |
| Armepavine                   | 442169    |
| Demethyleneberberine         | 363209    |
| 8-oxoberberine               | 12039004  |
| 8-oxoepiberberine            | 12799036  |
| Oxyberberine                 | 11066     |
| Oxypalmatine                 | 10926678  |
| Kihadanin B                  | 156766    |
| Niloticin                    | 14021529  |
| Obaculactone or limonin      | 179651    |
| Obacunone or Obacunoic acid  | 119041    |
| Rutaevin                     | 441805    |
| Coniferin                    | 5280372   |
| Vanilloloside                | 44577222  |
| Herculin                     | 5318023   |
| Ferulic acid                 | 445858    |
| Quinic acid                  | 6508      |
| Neochlorogenic acid          | 5280633   |
| 3-O-feruloylquinic acid      | 9799386   |
| Chlorogenic acid             | 1794427   |
| Methyl 3-O-feruloylquininate | 24813764  |
| Methyl 5-O-feruloylquininate | 102004731 |
| Sanleng acid                 | 5321100   |
| (+/-)-lyoniresinol           | 10483388  |
| Amurensin                    | 5318156   |
| Quercetin                    | 5280343   |
| Phellamurin                  | 193876    |
| Phellatin                    | 44258781  |
| Phellavin                    | 5320517   |
| Phellodendroside             | 101316827 |
| Icariside-1                  | 5745470   |
| Phellamuretin                | 7092536   |
| Isovaleric acid              | 10430     |
| 7-Dehydrostigmasterol        | 12303924  |
| Syringin                     | 5316860   |



|    |                    |                                   |           |    |
|----|--------------------|-----------------------------------|-----------|----|
|    |                    | Daucosterol                       | 5742590   |    |
|    |                    | $\alpha$ -Pinene                  | 6654      |    |
|    |                    | Sabinene                          | 18818     |    |
|    |                    | $\beta$ -Myrcene                  | 31253     |    |
|    |                    | d-Limonene                        | 440917    |    |
|    |                    | (Z)- $\beta$ -Ocimene             | 5320250   |    |
|    |                    | (E)- $\beta$ -Ocimene             | 5281553   |    |
| 7. | Mentha arvensis    | 3-Octanol                         | 11527     |    |
|    | (15)               | l-Menthone                        | 26447     | 23 |
|    |                    | Isomenthone                       | 6986      |    |
|    |                    | Menthyl acetate                   | 27867     |    |
|    |                    | Neomenthol                        | 19243     |    |
|    |                    | Caryophyllene                     | 5281515   |    |
|    |                    | l-Menthol                         | 16666     |    |
|    |                    | $\alpha$ -Terpineol               | 17100     |    |
|    |                    | Piperitone                        | 6987      |    |
|    |                    | 5-O-caffeoyl quinic acid          | 5280633   | 24 |
|    |                    | chlorogenic acid methyl ester     | 6476139   | 24 |
|    |                    | quercetin                         | 5280343   | 24 |
|    |                    | quercitrin                        | 5280459   | 24 |
|    |                    | isoquercitrin                     | 5280804   | 24 |
|    |                    | rutin                             | 5280805   | 24 |
|    |                    | saikosaponin D                    | 107793    | 24 |
|    |                    | saikosaponin A                    | 167928    | 24 |
| 8. | Bupleurum falcatum | saikosaponin C                    | 131801344 | 24 |
|    | (20)               | 2,2,4-trimethyl-3-penten-1-ol     | 79926     | 25 |
|    |                    | 2,3-dimethyl-3-buten-2-ol         | 82652     | 25 |
|    |                    | 2,3-dimethyl-pentane              | 11260     | 25 |
|    |                    | 9-octadecenoic acid (z)           | 6439696   | 25 |
|    |                    | octadecanoic acid                 | 5281      | 25 |
|    |                    | nonanedioic acid                  | 2266      | 25 |
|    |                    | octanedioic acid                  | 10457     | 25 |
|    |                    | 6-O-acetyl-saikosaponin d         | 21637630  | 25 |
|    |                    | Palbinone                         | 9841735   |    |
|    |                    | 13-Methyl tetradecanoic acid      | 151014    |    |
|    |                    | Peonin (peonidin-3,5-diglucoside) | 44256843  |    |
|    |                    | Albiflorin                        | 24868421  |    |
|    |                    | Albiflorin R1                     | 5317181   |    |
|    |                    | Benzoylpaeoniflorin               | 21631106  |    |
|    |                    | 8-Debenzoylpaeoniflorin           | 71452333  |    |
| 9. | Paeonia lactiflora | Paeonidanin B                     | 102417825 |    |
|    | (45)               | Paeonidanin A                     | 44253993  | 26 |
|    |                    | Paeonidanin C                     | 46883513  |    |
|    |                    | Paeoniflorigenone                 | 70698143  |    |
|    |                    | Paeoniflorin                      | 442534    |    |
|    |                    | Paeonilactone A                   | 10081437  |    |
|    |                    | Paeonilactone B                   | 10375422  |    |
|    |                    | Paeonilactone C                   | 10471123  |    |
|    |                    | Pyrethrin I                       | 5281045   |    |
|    |                    | Pyrethrin II                      | 5281555   |    |

|     |                     |                                         |           |    |
|-----|---------------------|-----------------------------------------|-----------|----|
|     |                     | $\beta$ -Sitosterol                     | 521199    |    |
|     |                     | Casuariin                               | 14035442  |    |
|     |                     | Casuarictin                             | 73644     |    |
|     |                     | 5-Desgalloylstachyurin                  | 10417809  |    |
|     |                     | 1-O-galloyl- $\beta$ -D-glucose         | 124021    |    |
|     |                     | 3-O-Galloylquinic acid                  | 442988    |    |
|     |                     | 4-O-Galloylquinic acid                  | 475263    |    |
|     |                     | Pedunculagin                            | 442688    |    |
|     |                     | 1,2,3,4,6-Pentagalloylglucose           | 65238     |    |
|     |                     | Strictinin                              | 73330     |    |
|     |                     | Tellimagrandin I                        | 442690    |    |
|     |                     | 1,3,6-Trigalloyl- $\beta$ -D-glucose    | 452707    |    |
|     |                     | 1,2,3-Tri-O-galloyl- $\beta$ -D-glucose | 13270010  |    |
|     |                     | Benzoic acid                            | 243       |    |
|     |                     | Phenol (Carbolic acid)                  | 996       |    |
|     |                     | p-hydroxybenzoic acid                   | 135       |    |
|     |                     | gallic acid                             | 370       |    |
|     |                     | methylgallate                           | 7428      |    |
|     |                     | paeonol                                 | 11092     |    |
|     |                     | paeonoside                              | 442924    |    |
|     |                     | (+)-catechin                            | 9064      |    |
|     |                     | Paeoniflorin                            | 442534    | 27 |
|     |                     | Oxypaeoniflorin                         | 21631105  |    |
|     |                     | Benzoyloxypaeoniflorin                  | 21631107  |    |
|     |                     | Galloylpaeoniflorin                     | 46882879  |    |
|     |                     | betulinic acid                          | 64971     |    |
|     |                     | hederagenin                             | 73299     |    |
|     |                     | oleanolic acid                          | 10494     |    |
|     |                     | Atractylenolide I                       | 5321018   | 28 |
|     |                     | Atractylenolide II                      | 14448070  | 28 |
|     |                     | Atractylenolide III                     | 155948    | 28 |
|     |                     | Atractylone                             | 3080635   | 28 |
|     |                     | Hinesol                                 | 10878761  | 28 |
|     |                     | $\beta$ -Eudesmol                       | 91714393  | 28 |
|     |                     | Atractylodin                            | 5321047   | 28 |
|     |                     | Stigmasterol                            | 5280794   | 28 |
|     |                     | coumarin osthol                         | 10228     | 29 |
|     | Atractylodes lancea | atractylochromene                       | 10244247  | 29 |
|     |                     | Kudtdiol                                | 26471785  | 29 |
| 10. |                     | atractyloside A                         | 71307451  | 29 |
|     | (30)                | atractyloside B                         | 71448952  | 29 |
|     |                     | pterocarpol                             | 12314741  | 29 |
|     |                     | eudesma-4(14),7(11)-dien-8-one          | 13986100  | 29 |
|     |                     | (+) eudesma-4(14),7(11)-dien-8-one      | 13986100  | 29 |
|     |                     | atractylenolide IV                      | 132510447 | 29 |
|     |                     | atractyloside C                         | 71448953  | 29 |
|     |                     | atractyloside D                         | 71448954  | 29 |
|     |                     | atractyloside E                         | 71448955  | 29 |
|     |                     | atractyloside G                         | 71448957  | 29 |
|     |                     | atractyloside I                         | 10929902  | 29 |

|     |                             |                                              |           |    |
|-----|-----------------------------|----------------------------------------------|-----------|----|
| 11. | Cimicifuga dahurica<br>(25) | atractyloside F                              | 71448956  | 29 |
|     |                             | heterolupeol                                 | 604983    | 29 |
|     |                             | Atractylodinol                               | 10012964  | 29 |
|     |                             | Acetylactylodinol                            | 5315531   | 29 |
|     |                             | 1,3-di-O-caffeoylquinic acid                 | 6474640   | 29 |
|     |                             | Osthol                                       | 10228     | 29 |
|     |                             | 5-hydroxymethyl furaldehyde                  | 237332    | 29 |
|     |                             | L-phenylalanine                              | 6140      | 29 |
|     |                             | diethyl phthalate                            | 6781      | 29 |
|     |                             | Geniposide                                   | 107848    | 30 |
|     |                             | 24-O-acetylhydroshengmanol                   | 157168    | 30 |
|     |                             | prim-O-glucosylcimifugin                     | 14034912  | 30 |
|     |                             | acerinol                                     | 73347277  | 30 |
|     |                             | cimigenol                                    | 16020000  | 30 |
|     |                             | Cimiracemoside C                             | 15541911  | 31 |
|     |                             | Cimigenoside                                 | 16088242  | 31 |
|     |                             | 25-O-Acetylcimigenol                         | 46881255  | 31 |
|     |                             | 25-Anhydrocimigenol                          | 15967434  | 31 |
|     |                             | 23-epi-26-Deoxyactein                        | 21668683  | 31 |
|     |                             | Actein                                       | 10032468  | 31 |
|     |                             | Cimicifugic acid A                           | 6449879   | 31 |
|     |                             | Cimicifugic acid B                           | 6449880   | 31 |
|     |                             | Cimicifugic acid D                           | 11742743  | 31 |
|     |                             | Cimicifugamide                               | 5318530   | 31 |
|     |                             | Visnagin                                     | 6716      | 31 |
|     |                             | 2-Isoferuloyl piscidic acid                  | 6450179   | 32 |
|     |                             | Ferulic acid 4-O- $\beta$ -D-glucopyranoside | 13916049  | 32 |
|     |                             | Caffeic acid 3-O- $\beta$ -D-glucopyranoside | 5281759   | 32 |
|     |                             | Shomaside A                                  | 46209783  | 32 |
|     |                             | Caffeic ester glucoside                      | 5281761   | 32 |
|     |                             | Caffeic methyl ester                         | 689075    | 32 |
|     |                             | Carboxymethyl isoferulate                    | 16729361  | 32 |
|     |                             | 3, 4-Dimethoxycinnamic acid                  | 717531    | 32 |
|     |                             | 2-Feruloyl piscidic acid                     | 10002902  | 32 |
|     |                             | (E)-3-(3-Methyl-2-butenylidene)-2-indolinone | 5319526   | 32 |
|     |                             | (Z)-3-(3-Methyl-2-butenylidene)-2-indolinone | 5249879   | 32 |
| 12. | Cnidium officinale<br>(08)  | 6-(1-oxopentyl)-salicylic acid methyl ester  | 134612870 | 33 |
|     |                             | Falcarindiol                                 | 5281148   | 33 |
|     |                             | conifenyl ferulate                           | 6441913   | 33 |
|     |                             | ferulic aldehyde                             | 5280536   | 33 |
|     |                             | senkyunolide C                               | 642374    | 33 |
|     |                             | (E)-3-methoxy-1-(3-methoxyphenyl)propane     | 15418925  | 33 |
|     |                             | Coniferol                                    | 1549095   | 33 |
| 13. | Angelica dahurica<br>(30)   | p-hydroxyphenol                              | 785       | 33 |
|     |                             | Isoimperatorin                               | 68081     | 34 |
|     |                             | imperatorin                                  | 10212     | 34 |
|     |                             | bergapten                                    | 2355      | 34 |
|     |                             | osthenol                                     | 5320318   | 34 |
|     |                             | xanthotoxin                                  | 4114      | 34 |
|     |                             | dehydrogeijerin                              | 620900    | 34 |

|  |                                              |           |    |
|--|----------------------------------------------|-----------|----|
|  | phellopterin                                 | 98608     | 34 |
|  | 7-demethylsuberosin                          | 5316525   | 34 |
|  | Alloimperatorin                              | 69502     | 34 |
|  | Xanthotoxol                                  | 65090     | 34 |
|  | Isooxypeucedanin                             | 625383    | 34 |
|  | Alloisoimperatorin                           | 5317436   | 34 |
|  | 5-hydroxy-8-methoxypsoralen                  | 5385192   | 34 |
|  | oxypeucedanin methanolate                    | 483514    | 34 |
|  | pabulenol                                    | 3009225   | 34 |
|  | byakangelicin                                | 10211     | 34 |
|  | marmesin                                     | 334704    | 34 |
|  | (+) -decursinol                              | 442127    | 34 |
|  | Heraclenol                                   | 73253     | 34 |
|  | oxypeucedanin hydrate                        | 17536     | 34 |
|  | marmesinin                                   | 216283    | 34 |
|  | ulopterol                                    | 176475    | 34 |
|  | uracil                                       | 1174      | 34 |
|  | oxypeucedanin                                | 160544    | 35 |
|  | byakangelicol                                | 3055167   | 35 |
|  | isopimpinellin                               | 68079     | 35 |
|  | pimpinellin                                  | 4825      | 35 |
|  | scopoletin                                   | 5280460   | 35 |
|  | 1-Phenylpropane-1,2-dione                    | 11363     | 36 |
|  | (S)-cathinone                                | 25203656  | 36 |
|  | (1R,2S)-norephedrine                         | 10297     | 36 |
|  | (2S,4S,5R)-2,4-dimethyl-5-phenyl oxazolidine | 130754154 | 36 |
|  | (1R,2S)-ephedrine                            | 6922965   | 36 |
|  | (1R,2S)-N-methylephedrine                    | 6918907   | 36 |
|  | (1S,2S)-norpseudoephedrine                   | 6918945   | 36 |
|  | (1S,2S)-pseudoephedrine                      | 7028      | 36 |
|  | (1S,2S)-N-methylpseudoephedrine              | 7059595   | 36 |
|  | proanthocyanidin A4                          | 13556387  | 36 |
|  | catechin                                     | 9064      | 37 |
|  | epicatechin                                  | 72276     | 37 |
|  | gallocatechin                                | 65084     | 37 |
|  | epigallocatechin                             | 72277     | 37 |
|  | Ephedradine A                                | 126326    | 37 |
|  | Ephedradine B                                | 156055    | 38 |
|  | Ephedradine C                                | 558490    | 38 |
|  | Ephedradine D                                | 100996000 | 38 |
|  | Feruloylhistamine                            | 10401784  | 38 |
|  | L(+)-Pseudoephedrine                         | 7028      | 38 |
|  | D(-)Norephedrine                             | 62943     | 38 |
|  | D(-)Methylephedrine                          | 3041454   | 38 |
|  | Ephedroxane                                  | 161171    | 38 |
|  | 2, 3, 4-Trimethyl-5-phenyloxazolidine        | 5322112   | 38 |
|  | Hordenine                                    | 68313     | 38 |
|  | Maokonine                                    | 54704413  | 38 |
|  | Tetramethylpyrazine                          | 14296     | 38 |
|  | N-methylbenzylamine                          | 7669      | 38 |

14.

Ephedra sinica

(55)

|  |  |                                                 |           |    |
|--|--|-------------------------------------------------|-----------|----|
|  |  | Herbacetin                                      | 5280544   | 38 |
|  |  | Herbacetin 7-methyl ether                       | 44259958  | 38 |
|  |  | Pollenitin                                      | 44259965  | 38 |
|  |  | Herbacetin 7-O-glucoside                        | 5318021   |    |
|  |  | Kaempferol 3-O-rhamnoside 7-O-glucoside         | 554033    |    |
|  |  | Herbacetin 7-O-neohesperidoside                 | 102444811 |    |
|  |  | Kaempferol-3-O-glucoside-7-O-rhamnoside         | 14035324  |    |
|  |  | Dihydroquercetin                                | 439533    |    |
|  |  | Naringenin                                      | 932       |    |
|  |  | Hesperidin                                      | 10621     |    |
|  |  | (-)-epicatechin                                 | 72276     |    |
|  |  | (-)-epiafzelechin                               | 443639    |    |
|  |  | Afzelechin                                      | 442154    |    |
|  |  | Leucocyanidin                                   | 71629     |    |
|  |  | Symplocoside                                    | 44257110  |    |
|  |  | Tricin                                          | 5281702   |    |
|  |  | Apigenin                                        | 5280443   | 38 |
|  |  | 3-Methoxyherbacetin                             | 5319442   |    |
|  |  | Swertisin                                       | 124034    |    |
|  |  | Isovitexin-2''-O-rhamnoside                     | 23844078  |    |
|  |  | Leucodelphinidin                                | 3081374   |    |
|  |  | Ephedrannin A                                   | 21676348  |    |
|  |  | Ephedrannin B                                   | 25051177  |    |
|  |  | Sesquipinsapol B                                | 101767126 |    |
|  |  | Ethyl caprylate                                 | 7799      |    |
|  |  | Sitosterol                                      | 222284    |    |
|  |  | Trans-cinnamic acid                             | 444539    |    |
|  |  | Physcion                                        | 10639     |    |
|  |  | Rhein                                           | 10168     |    |
|  |  | Panaxadione                                     | 25233029  |    |
|  |  | 20(S)-protopanaxatriol                          | 11468733  |    |
|  |  | 3-keto-20(S)-protopanaxatriol                   | 44198762  |    |
|  |  | ginsenoside Rg2                                 | 21599924  |    |
|  |  | ginsenoside Rd                                  | 24721561  |    |
|  |  | phenethyl alcohol- xylopyranosyl(1→6)glucopyra- |           |    |
|  |  | noside                                          | 131129    | 39 |
|  |  | panaxoside A                                    | 441923    | 39 |
|  |  | Panaxoside Re                                   | 58774156  | 39 |
|  |  | protopanaxadiol                                 | 9920281   | 39 |
|  |  | panacon                                         | 6325774   | 39 |
|  |  | panaxadiol                                      | 73498     | 39 |
|  |  | panaxol                                         | 328778    | 39 |
|  |  | ginsenoside R0                                  | 11815492  | 40 |
|  |  | ginsenoside Rb-1                                | 9898279   |    |
|  |  | ginsenoside Rb-2                                | 6917976   |    |
|  |  | ginsenoside Rc                                  | 12855889  |    |
|  |  | ginsenoside Rd                                  | 24721561  |    |
|  |  | ginsenoside Rf                                  | 441922    |    |
|  |  | ginsenoside Rg-1                                | 441923    |    |
|  |  | ginsenoside Rg-2                                | 21599924  |    |

15.

Panax ginseng

(30)



|     |                             |                                 |           |    |
|-----|-----------------------------|---------------------------------|-----------|----|
| 16. | Zingiber officinale<br>(45) | ginsenoside Rg-3                | 9918693   | 41 |
|     |                             | ginsenoside Rh-1                | 12855920  |    |
|     |                             | ginsenoside Rh-2                | 119307    |    |
|     |                             | panacene                        | 181799    |    |
|     |                             | $\beta$ -elemene                | 6918391   |    |
|     |                             | citric acid                     | 311       |    |
|     |                             | fumaric acid                    | 444972    |    |
|     |                             | ketoglutaric acid               | 51        |    |
|     |                             | choline                         | 305       |    |
|     |                             | [6]-gingerol                    | 442793    |    |
|     |                             | [6]-shogaol                     | 5281794   |    |
|     |                             | [4]-gingerol                    | 5317596   |    |
|     |                             | [7]-gingerol                    | 11472344  |    |
|     |                             | [8]-gingerol                    | 168114    |    |
|     |                             | [10]-gingerol                   | 168115    |    |
|     |                             | [6]-Paradol                     | 94378     |    |
|     |                             | [7]- paradol                    | 13733135  |    |
|     |                             | [8]- paradol                    | 213821    |    |
|     |                             | [10]- paradol                   | 51352076  |    |
|     |                             | methyl [6]-paradol              | 85807832  |    |
|     |                             | [4]- shogaol                    | 9794897   |    |
|     |                             | [8]- shogaol                    | 6442560   |    |
|     |                             | [10]- shogaol                   | 6442612   |    |
|     |                             | [12]-shogaol                    | 9975813   |    |
|     |                             | [6]-isoshogaol                  | 11694761  |    |
|     |                             | [6]- gingerdione                | 162952    |    |
|     |                             | [8]- gingerdione                | 14440537  |    |
|     |                             | [10]- gingerdione               | 14440539  |    |
|     |                             | [12]- gingerdione               | 86251913  |    |
|     |                             | citral/ geranial                | 638011    | 42 |
|     |                             | borneol                         | 64685     |    |
|     |                             | bisabolene                      | 3033866   |    |
|     |                             | Gingerdiol                      | 11369949  |    |
|     |                             | 1-dehydrogingerdione            | 9796015   |    |
|     |                             | 5-acetoxy [6] gingerdiol        | 101419545 |    |
|     |                             | Ar-curcumene                    | 92139     |    |
|     |                             | $\beta$ -bisabolene             | 10104370  |    |
|     |                             | (-) $\beta$ -sesquiphellandrene | 519764    |    |
|     |                             | 6-methyl-5-hepten-2-one         | 9862      |    |
|     |                             | $\alpha$ -phellandrene          | 7460      |    |
|     |                             | $\beta$ -phellandrene           | 11142     |    |
|     |                             | limonene                        | 22311     |    |
|     |                             | citronellol                     | 8842      |    |
|     |                             | neral                           | 643779    |    |
|     |                             | geraniol                        | 637566    |    |
|     |                             | bornyl acetate                  | 6448      |    |
|     |                             | 2 undecanone                    | 8163      |    |
|     |                             | citronellyl acetate             | 9017      |    |
|     |                             | $\alpha$ -copaene               | 70678558  |    |
|     |                             | geranyl acetate                 | 1549026   |    |

|     |                      |                                                         |           |    |
|-----|----------------------|---------------------------------------------------------|-----------|----|
|     |                      | eucalyptol/ 1,8-cineole                                 | 2758      |    |
|     |                      | isobornyl formate                                       | 23623868  | 43 |
|     |                      | $\alpha$ -zingiberene                                   | 521253    | 43 |
|     |                      | $\alpha$ farnesene                                      | 5281516   | 43 |
| 17. | Poria cocos<br>(43)  | dehydroeburicoic acid                                   | 15250826  | 44 |
|     |                      | 3-epi-dehydrotumulosic acid                             | 10005581  | 44 |
|     |                      | dehydrotrametenolic acid                                | 15250826  | 44 |
|     |                      | pachymic acid                                           | 5484385   | 44 |
|     |                      | eburicoic acid                                          | 73402     | 44 |
|     |                      | trametenolic acid                                       | 12309443  | 44 |
|     |                      | $\alpha$ -amyrin acetate                                | 71597151  | 44 |
|     |                      | adenosine                                               | 60961     | 44 |
|     |                      | 16 $\alpha$ -Hydroxytrametenolic acid                   | 132285301 | 45 |
|     |                      | 3-O-Acetyl-16 $\alpha$ -hydroxytrametenolic acid        | 15226712  | 45 |
|     |                      | 3-O-Acetyl-16 $\alpha$ -hydroxydehydrotrametenolic acid | 15226714  | 45 |
|     |                      | Dehydrotrametenonic acid                                | 44424826  | 45 |
|     |                      | Dehydroeburiconic acid                                  | 11431307  | 45 |
|     |                      | Dehydropachymic acid                                    | 15226717  | 45 |
|     |                      | 3-epi-Dehydropachymic acid                              | 15226716  | 45 |
|     |                      | Tumulosic acid                                          | 12314446  | 45 |
|     |                      | Dehydrotumulosic acid                                   | 15225964  | 45 |
|     |                      | 3-epi-Dehydrotumulosic acid                             | 10005581  | 45 |
|     |                      | 15 $\alpha$ -Hydroxydehydrotumulosic acid               | 16736459  | 45 |
|     |                      | Polyporenic acid C                                      | 9805290   | 45 |
|     |                      | 6 $\alpha$ -Hydroxypolyporenic acid C                   | 101280198 |    |
|     |                      | 29-Hydroxypolyporenic acid C                            | 139585448 |    |
|     |                      | 25-Hydroxy-3-epi-tumulosic acid                         | 46882675  |    |
|     |                      | 5 $\alpha$ -8 $\alpha$ -Peroxydehydrotumulosic acid     | 16736654  |    |
|     |                      | Poricoic acid B                                         | 5471852   |    |
|     |                      | 16-Deoxyporicoic acid B                                 | 16736458  |    |
|     |                      | Poricoic acid E                                         | 15225966  |    |
|     |                      | Poricoic acid BM                                        | 15225967  |    |
|     |                      | Poricoic acid G                                         | 5471966   |    |
|     |                      | Poricoic acid GM                                        | 44556812  |    |
|     |                      | Poricoic acid A                                         | 5471851   |    |
|     |                      | Poricoic acid C                                         | 56668247  | 45 |
|     |                      | Poricoic acid D                                         | 44424827  |    |
|     |                      | Poricoic acid F                                         | 101928114 |    |
|     |                      | Poricoic acid H                                         | 10918099  |    |
|     |                      | Poricoic acid CM                                        | 16736060  |    |
|     |                      | Poricoic acid DM                                        | 44424830  |    |
|     |                      | Poricoic acid HM                                        | 44556877  |    |
|     |                      | 6,7-Dehydroporicoic acid H                              | 44556878  |    |
|     |                      | 25-Hydroxyporicoic acid C                               | 44556811  |    |
|     |                      | 25-Hydroxyporicoic acid H                               | 16736865  |    |
|     |                      | 26-Hydroxyporicoic acid DM                              | 44556810  |    |
|     |                      | 25-Methoxyporicoic acid A                               | 46882628  |    |
| 18. | Paeonia suffruticosa | Mudanpioside F                                          | 21631108  | 46 |
|     |                      | Procyanidin B6                                          | 474540    |    |

|      |                                           |           |    |
|------|-------------------------------------------|-----------|----|
| (60) | Oxypaeoniflorin                           | 21631105  |    |
|      | Procyanidin B6                            | 474540    |    |
|      | Mudanpioside E                            | 86278277  |    |
|      | (p)-Catechin                              | 107957    |    |
|      | Apiopaeonoside                            | 127509    |    |
|      | Methyl gallate                            | 7428      |    |
|      | Paeonolide                                | 442923    |    |
|      | 1,3,6-Tri-O-galloyl-b-D-glucose           | 452707    |    |
|      | Suffruticoside A                          | 9986231   |    |
|      | Suffruticoside B                          | 10258205  |    |
|      | Suffruticoside C                          | 10258206  |    |
|      | Suffruticoside D                          | 5321547   |    |
|      | Tetragalloyl glucose                      | 102012877 |    |
|      | Suffruticoside A                          | 9986231   |    |
|      | Suffruticoside B                          | 10258205  |    |
|      | Suffruticoside C                          | 10258206  |    |
|      | Suffruticoside D                          | 5321547   |    |
|      | Quercetin 7-O-glucoside                   | 5381351   |    |
|      | Galloylpaeoniflorin                       | 46882879  |    |
|      | Albiflorin                                | 24868421  |    |
|      | 1,2,3,4,6-Penta-O-galloyol-beta-D glucose | 65238     |    |
|      | Mudanpioside H                            | 71457654  |    |
|      | Hexagalloyl glucose                       | 54036807  |    |
|      | Galloyloxypaeoniflorin                    | 3036133   |    |
|      | Benzoyloxypaeoniflorin                    | 21631107  |    |
|      | Quercetin 3-O-rhamnosylglucoside          | 5491657   |    |
|      | Mudanpioside C                            | 21631098  |    |
|      | Benzoylpaeoniflorin                       | 21631106  |    |
|      | Mudanpioside B                            | 21631102  |    |
|      | hederagenin                               | 73299     | 47 |
|      | chrysoeriol                               | 5280666   | 47 |
|      | trans-ε-viniferin                         | 5281728   | 47 |
|      | trans-resveratrol                         | 445154    | 47 |
|      | stigmaterol                               | 5280794   | 47 |
|      | β-daucosterol                             | 5742590   | 47 |
|      | quinic acid                               | 6508      | 48 |
|      | galloylquinic acid                        | 129650210 | 48 |
|      | kaempferol 3,7-di-O-glucoside             | 6325460   | 48 |
|      | isorhamnetin 3,7-di-O-glucoside           | 5323537   | 48 |
|      | galloyl glucose                           | 124021    | 48 |
|      | pentagalloylglucose                       | 65238     | 48 |
|      | hexagalloylglucose                        | 129630523 | 48 |
|      | heptagalloylglucose                       | 25202629  | 48 |
|      | Paeonisuffrone                            | 10104180  | 49 |
|      | Paeonisuffral                             | 101050848 | 49 |
|      | Deoxypaeonisuffrone                       | 10035257  | 49 |
|      | mudanpioside A                            | 21631101  | 49 |
|      | mudanpioside D                            | 21631103  | 49 |
|      | α-benzoyloxypaeoniflorin                  | 102597515 | 49 |
|      | β-benzoyloxypaeoniflorin                  | 21631107  | 49 |

|  |                       |                              |           |    |
|--|-----------------------|------------------------------|-----------|----|
|  |                       | oxypaeonidanin               | 71457653  | 49 |
|  |                       | 9-epi-oxypaeonidanin         | 71450490  | 49 |
|  |                       | trigalloyl-glucose           | 440308    | 49 |
|  |                       | (-)-Epigallocatechin gallate | 65064     | 49 |
|  |                       | uridine                      | 6029      | 49 |
|  |                       | thymidine                    | 5789      | 49 |
|  |                       | paeoniflorigenone            | 70698143  | 49 |
|  |                       | Honokiol                     | 72303     |    |
|  |                       | pinoresinol                  | 73399     |    |
|  |                       | salicylic acid               | 338       |    |
|  |                       | p-hydroxy-cinnamic acid      | 637542    |    |
|  |                       | songorine                    | 71456946  |    |
|  |                       | karakoline                   | 441742    |    |
|  |                       | Aconitine                    | 245005    |    |
|  |                       | Mesaconitine                 | 441747    |    |
|  |                       | Hypaconitine                 | 441737    |    |
|  |                       | Talatizamine                 | 441761    |    |
|  |                       | Isotalatizidine              | 3084020   |    |
|  |                       | Neoline                      | 120682    |    |
|  |                       | Fuziline                     | 14163819  |    |
|  |                       | Isodelphinine                | 102146471 |    |
|  | Aconitum carmichaelii | Benzoylmesaconine            | 24832659  | 50 |
|  | Debeaux               | Senbusine A                  | 158048    | 50 |
|  |                       | Senbusine C                  | 14163819  | 50 |
|  |                       | Hokbusine A                  | 24832661  | 50 |
|  | (65)                  | Benzoylaconine               | 20055771  | 50 |
|  |                       | Benzoylhypaconine            | 78358526  | 51 |
|  |                       | Neojiangyouaconitine         | 78358553  |    |
|  |                       | Aldohypaconitine             | 5317220   |    |
|  |                       | Deoxyaconitine               | 21598997  |    |
|  |                       | Beiwutine                    | 21627927  |    |
|  |                       | Aconifine                    | 441705    |    |
|  |                       | Aconine                      | 20054813  |    |
|  |                       | Yunaconitine                 | 155569    |    |
|  |                       | Chasmanine                   | 20055812  |    |
|  |                       | Foresticine                  | 154723942 |    |
|  |                       | N-deethylaconine             | 101552717 |    |
|  |                       | Beiwutinine                  | 101552718 |    |
|  |                       | Hypaconine                   | 101671038 |    |
|  |                       | Mesaconine                   | 76189547  |    |
|  |                       | Oxonitine                    | 6708531   |    |
|  |                       | Guiwuline                    | 70688216  |    |
|  |                       | Bullatine B                  | 120682    |    |
|  |                       | Penduline                    | 179472    |    |
|  |                       | Ignavine                     | 71448929  |    |
|  |                       | Delgradine                   | 139075130 | 51 |
|  |                       | 14-O-Anisoylneoline          | 12068477  |    |
|  |                       | 14-O-Acetyneoline            | 14312993  |    |
|  |                       | Foresaconitine               | 20055981  |    |
|  |                       | Crassicauline A              | 157539    |    |

|      |                              |           |    |
|------|------------------------------|-----------|----|
|      | Hetisine                     | 431673    |    |
|      | Songoramine                  | 14526618  |    |
|      | 12-Epinapelline              | 3133561   |    |
|      | Aconicarchamine A            | 102484827 |    |
|      | Aconicarchamine B            | 102484828 |    |
|      | Napelline                    | 441749    |    |
|      | Carmichaeline A              | 102144179 |    |
|      | Yokonoside                   | 3085046   |    |
|      | Higenamine                   | 114840    |    |
|      | Salsolinol                   | 91588     |    |
|      | Fuzitine                     | 72201752  |    |
|      | Oleracein E                  | 21574476  |    |
|      | 16beta-Hydroxycardiopetaline | 102511299 |    |
|      | Columbianine                 | 101457306 |    |
|      | Aconitamide                  | 15944660  |    |
|      | 6''-O-Acetyllicquiritin      | 101051311 |    |
|      | Liquiritigenin               | 114829    |    |
|      | Isoliquiritigenin            | 638278    |    |
|      | Liquiritin                   | 503737    |    |
|      | Gracillin                    | 159861    |    |
|      | Glyceryl monopalmitate       | 3084463   |    |
|      | Fuzinoside                   | 102339571 |    |
| 20.  | Danshensu                    | 11600642  | 52 |
|      | protocatechuic aldehyde      | 8768      |    |
|      | lithospermic acid            | 6441498   |    |
|      | tanshinone IIB               | 9926694   |    |
|      | dihydrotanshinone I          | 11425923  |    |
|      | tanshinone I                 | 114917    |    |
|      | miltiradiene                 | 20837867  |    |
|      | isoquercitrin                | 5280804   |    |
|      | salvianolic acid A           | 5281793   |    |
|      | salvianolic acid B           | 11629084  |    |
| (60) | salvianolic acid C           | 13991590  | 53 |
|      | salvianolic acid D           | 75412558  |    |
|      | salvianolic acid E           | 86278266  |    |
|      | salvianolic acid G           | 11530200  |    |
|      | methyl rosmarinate           | 6479915   |    |
|      | dimethyl lithospermate       | 70688393  |    |
|      | lithospermic acid B          | 6451084   |    |
|      | ursolic acid                 | 64945     |    |
|      | tigogenin                    | 99516     |    |
|      | tanshinone IIA               | 164676    |    |
|      | tanshinone VI                | 149138    |    |
|      | cryptotanshinone             | 160254    |    |
|      | isotanshinone I              | 623940    |    |
|      | isotanshinone II             | 44425166  |    |
|      | isotanshinone IIB            | 184102    |    |
|      | isocryptotanshinone          | 626608    |    |
|      | hydroxytanshinone IIA        | 5318349   |    |
|      | methyl tanshinonate          | 14610613  |    |



|     |               |                                                  |           |    |
|-----|---------------|--------------------------------------------------|-----------|----|
|     |               | danshenxinkun A                                  | 149138    |    |
|     |               | danshenxinkun B                                  | 5320113   |    |
|     |               | danshenxinkun C                                  | 5320114   |    |
|     |               | danshenxinkun D                                  | 127172    |    |
|     |               | dihydroisotanshinone I                           | 89406     |    |
|     |               | neocryptotanshinone                              | 389888    |    |
|     |               | deoxyneocryptotanshinone                         | 15690458  |    |
|     |               | salviol                                          | 13966146  |    |
|     |               | nortanshinone                                    | 10062187  |    |
|     |               | Tanshindiol A                                    | 16730071  |    |
|     |               | Tanshindiol B                                    | 5321620   |    |
|     |               | Tanshindiol C                                    | 126072    |    |
|     |               | Miltirone                                        | 160142    |    |
|     |               | 1,2-Dihydrotanshinquinone                        | 105119    |    |
|     |               | Ferruginol                                       | 442027    |    |
|     |               | 4-methylenemiltirone                             | 14609851  | 53 |
|     |               | Tanshinlactone                                   | 5321617   |    |
|     |               | danshinspiroketallactone                         | 5316298   |    |
|     |               | Epidanshenspiroketallactone                      | 102004791 |    |
|     |               | cryptoacetalide                                  | 46896125  |    |
|     |               | miltiodiol                                       | 11011966  |    |
|     |               | miltipolone                                      | 10086184  |    |
|     |               | norsalvioxide                                    | 14139391  |    |
|     |               | 2-isopropyl-8-methylphenanthrene-3,4-dione       | 135872    |    |
|     |               | Dihydrotanshinone                                | 5316743   |    |
|     |               | Neosalvianen                                     | 11472648  |    |
|     |               | Salvianen                                        | 11186248  |    |
|     |               | Salviadione                                      | 135442608 | 54 |
|     |               | Lithospermic acid B                              | 6451084   |    |
|     |               | Dihydrotanshinone I                              | 11425923  |    |
|     |               | Cryptotanshinone                                 | 160254    |    |
|     |               | Tanshinone IIA                                   | 164676    |    |
|     |               | Hesperidin                                       | 10621     | 55 |
|     |               | Naringin                                         | 442428    | 55 |
|     |               | Neohesperidin                                    | 442439    | 55 |
|     |               | Naringenin                                       | 932       | 55 |
|     |               | Hesperetin                                       | 72281     | 55 |
| 21. | Citrus unshiu | <i>p</i> -coumaric acid                          | 637542    | 56 |
|     | (25)          | sinapic acid                                     | 637775    | 56 |
|     |               | protocatechuic acid                              | 72        | 56 |
|     |               | <i>p</i> -hydroxybenzoic acid                    | 135       | 56 |
|     |               | vanillic acid                                    | 8468      | 56 |
|     |               | narirutin                                        | 442431    | 56 |
|     |               | Nobiletin (3',4',5,6,7,8-hexamethoxyflavone)     | 72344     | 57 |
|     |               | kaempferol 3-O-rutinoside                        | 5318767   | 57 |
|     |               | limocitrin 3-glucoside                           | 44259988  | 57 |
|     |               | didymin (4'-methoxyl naringenin 7- O-rutinoside) | 16760075  | 57 |
|     |               | naringenin 7-Orutinoside                         |           |    |
|     |               | Hesperetin-7-O-glucoside                         | 85704     | 57 |
|     |               | Prunin                                           | 20111686  | 58 |

|     |                                                 |           |    |
|-----|-------------------------------------------------|-----------|----|
|     | Sinensetin                                      | 92794     | 58 |
|     | Tangeretin                                      | 145659    | 58 |
|     | $\gamma$ -terpinene                             | 68077     | 58 |
|     | 2- $\beta$ -pinene                              | 7461      | 59 |
|     | 1-methyl-2-isopropylbenzene                     | 6654      | 59 |
|     | L-limonene                                      | 10703     | 59 |
|     | $\beta$ -ocimene                                | 439250    | 59 |
|     |                                                 | 5281553   | 59 |
|     | geniposidic acid                                | 443354    |    |
|     | chlorogenic acid                                | 1794427   |    |
|     | genipin-1- $\beta$ -gentiobioside               | 14179128  |    |
|     | geniposide                                      | 107848    |    |
|     | genipin                                         | 442424    |    |
|     | crocin-1                                        | 5281233   |    |
|     | crocin-2                                        | 9940690   |    |
|     | jasminoside I                                   | 102596097 |    |
|     | gardenoside                                     | 24721095  |    |
|     | gardaloside                                     | 11631807  |    |
|     | 5, 7, 3', 4', 5'-pentamethoxyflavone            | 16044716  |    |
|     | shikimic acid                                   | 8742      |    |
|     | 1, 2, 4-benzenetriol                            | 10787     |    |
|     | 3, 4-dimethoxy-benzoic acid                     | 86584921  | 60 |
| 22. | dibutyl phthalate                               | 3026      |    |
|     | diisobutyl phthalate                            | 6782      |    |
|     | $\alpha$ -gardiol                               | 101936008 |    |
|     | $\beta$ -gardiol                                | 57340454  |    |
|     | genameside C                                    | 11692460  |    |
|     | deacetylasperulosidic acid                      | 12315350  |    |
|     |                                                 | 10742     |    |
|     | syringic acid                                   | 8655      |    |
|     | syringaldehyde                                  | 8468      |    |
|     | vanillic acid                                   | 129848169 |    |
|     | 3-hydroxy-vanillic acid                         | 69505     |    |
|     | 3, 4, 5-trimethoxy-phenol                       | 31244     |    |
|     | 4-methoxy-benzaldehyde                          | 129848159 |    |
|     | 7-hydroxy-5-methoxy-chromone                    | 5496475   |    |
|     | 5, 7, 3'-trihydroxy-6, 4', 5'-trimethoxyflavone |           |    |
|     | 3beta,23- dihydroxyurs-12-en-28-oic acid        | 14136881  |    |
|     | emodin                                          | 3220      |    |
|     | physcion                                        | 10639     |    |
|     | stearic acid                                    | 5281      |    |
|     | Gardenal                                        | 4763      |    |
|     | Geniposide                                      | 107848    |    |
|     | 6- $\alpha$ -hydroxy geniposide                 | 6325021   | 60 |
|     | Feretoside                                      | 442433    |    |
|     | genipin-1- $\beta$ -gentiobioside               | 14179128  |    |
|     | shanzhiside                                     | 11948668  |    |
|     | lamalbidic acid                                 | 101434718 |    |
|     | picrocrocinic acid                              | 5320582   |    |
|     | jasminoside A                                   | 98050833  |    |

|     |  |                                                                   |           |    |
|-----|--|-------------------------------------------------------------------|-----------|----|
|     |  | epijasminoside A                                                  | 76551288  |    |
|     |  | jasminoside R                                                     | 71552546  |    |
|     |  | jasminoside S                                                     | 71552547  |    |
|     |  | jasminoside T                                                     | 71552548  |    |
|     |  | chikusetsusaponin IVa methyl ester                                | 637855    |    |
|     |  | chikusetsusaponin IVa butyl ester                                 | 44566502  |    |
|     |  | protocatechuic acid                                               | 72        |    |
|     |  | genipin-gentiobioside                                             | 3082301   |    |
|     |  | 7alpha-hydroxy sitosterol                                         | 146158661 |    |
|     |  | jasminosides R                                                    | 71552546  |    |
|     |  | z-3-hexenyl tiglate                                               | 5352469   |    |
|     |  | trans-beta-ocimene                                                | 5281553   |    |
|     |  | genipin 1-O-beta-D-gentiobioside                                  | 3082301   |    |
|     |  | scandoside methyl ester                                           | 442433    |    |
|     |  | deacetylasperulosidic acid methyl ester                           | 6325021   |    |
|     |  | 10-O-succinoylgeniposide                                          | 44255239  | 60 |
|     |  | 6'-O-acetylgeniposide                                             | 44253991  |    |
|     |  | 10-O-acetylgeniposide                                             | 6324916   |    |
|     |  | Jasminodiols                                                      | 24896698  |    |
|     |  | jasminoside H                                                     | 102596096 |    |
|     |  | jasminoside I                                                     | 102596097 |    |
|     |  | imperatorin                                                       | 10212     |    |
|     |  | isoimperatorin                                                    | 68081     |    |
|     |  | crocetin                                                          | 5281232   |    |
|     |  | sudan III                                                         | 62331     |    |
|     |  | crocin-3                                                          | 10461942  |    |
|     |  | methyl 5-O-caffeoyl-3-O-sinapoylquinat                            | 11671431  |    |
|     |  | ethyl 5-O-caffeoyl-3-O-sinapoylquinat                             | 11699888  |    |
|     |  | methyl 5-O-caffeoyl-4-O-sinapoylquinat                            | 11635556  |    |
|     |  | ethyl 5-O-caffeoyl-4-O-sinapoylquinat                             | 11512664  |    |
|     |  | methyl 3,5-di-O-caffeoyl-4-O-(3-hydroxy-3-methyl) glutaroylquinat | 11693219  | 60 |
|     |  | Ixoroside                                                         | 44566558  |    |
|     |  | 8-epiapodantheroside                                              | 11372643  |    |
|     |  | gardenate A                                                       | 10611205  |    |
|     |  | 2-hydroxyethylgardenamide A                                       | 10825707  |    |
|     |  | Jasminoside F                                                     | 10807517  |    |
|     |  | β-amyrin                                                          | 225687    | 61 |
|     |  | β-amyrin acetate                                                  | 345510    | 61 |
|     |  | uvaol                                                             | 92802     | 61 |
|     |  | gentiopicroside                                                   | 88708     | 62 |
|     |  | 6beta-hydroxyswertiajaposide A                                    | 11153922  | 62 |
|     |  | Gelidoside                                                        | 46174003  | 62 |
| 23. |  | Trifloroside                                                      | 101688128 | 62 |
|     |  | Scabraside                                                        | 159134    | 62 |
|     |  | Durvillonol                                                       | 634965    | 63 |
|     |  | masilinic acid                                                    | 73659     | 63 |
|     |  | urjinolic acid                                                    | 146156259 | 63 |
|     |  | 3beta-erythrodiol                                                 | 101761    | 63 |
|     |  | corosolic acid                                                    | 6918774   | 63 |

|                                        |                                          |           |    |
|----------------------------------------|------------------------------------------|-----------|----|
|                                        | pygenic acid C                           | 69049736  | 63 |
|                                        | chiratenol                               | 14831162  | 63 |
| 24.                                    | Magnolol                                 | 72300     | 64 |
|                                        | Honokiol                                 | 72303     |    |
|                                        | O-methylhonokiol                         | 155160    |    |
|                                        | Piperitylmagnolol                        | 11732171  |    |
|                                        | Dipiperitylmagnolol                      | 101612410 |    |
|                                        | Piperitylhonokiol                        | 13337242  |    |
|                                        | Bornylmagnolol                           | 13337239  |    |
|                                        | Eudesmagnolol                            | 14587417  |    |
|                                        | Eudeshonokiol A                          | 14587421  |    |
|                                        | Eudeshonokiol B                          | 21726646  |    |
|                                        | Clovanemagnolol                          | 10323149  |    |
|                                        | Caryolanemagnolol                        | 21726647  |    |
|                                        | Magnolignan A                            | 5319201   |    |
|                                        | Magnolignan B                            | 5319202   |    |
|                                        | Magnolignan C                            | 5319203   |    |
|                                        | Magnolignan D                            | 5319204   |    |
|                                        | Magnolignan A-2-O-beta-D-glucopyranoside | 71720154  |    |
|                                        | Randainal/Magnaldehyde B                 | 5320888   |    |
|                                        | Randaiol                                 | 13337243  |    |
|                                        | Magnatriol B                             | 5319191   |    |
|                                        | Magnaldehyde D                           | 5319189   |    |
|                                        | Magnaldehyde E                           | 5319190   |    |
|                                        | 4'-methoxymagnaldehyde B                 | 23657448  |    |
|                                        | 4'-methoxymagnaldehyde E                 | 23657447  |    |
| Magnolignan E                          | 15714551                                 |           |    |
| Coumanolignan                          | 24796112                                 |           |    |
| Magnaldehyde C                         | 5319188                                  |           |    |
| 4'-methoxymagnaldehyde                 | 23634517                                 |           |    |
| Manglieside D                          | 102473624                                |           |    |
| Magnolignan F                          | 5319207                                  |           |    |
| Magnolignan I                          | 373768                                   |           |    |
| Isomagnolol                            | 159137                                   |           |    |
| Obovatol                               | 100771                                   |           |    |
| Eudesobovatol A                        | 442837                                   |           |    |
| Eudesobovatol B                        | 10346031                                 |           |    |
| Obovatal                               | 6439677                                  |           |    |
| Magnolignan G                          | 15714552                                 |           |    |
| Magnolignan H                          | 373767                                   |           |    |
| Icariside E5                           | 91884923                                 |           |    |
| Lariciresinol                          | 332427                                   |           |    |
| (+)-Syringaresinol                     | 443023                                   |           |    |
| Pinoresinol-4-O-beta-D-glucopyranoside | 486614                                   |           |    |
| Magnoloside A                          | 21629882                                 |           |    |
| Magnoloside B                          | 14018784                                 |           |    |
| Magnoloside C                          | 14018786                                 |           |    |
| Magnoloside D                          | 131676053                                |           |    |
| Crassifolioside                        | 102193658                                |           |    |
| Acteoside                              | 5281800                                  |           |    |

|                             |           |    |
|-----------------------------|-----------|----|
| Tachioside                  | 11962143  |    |
| Syringaldehyde              | 8655      |    |
| Sinapic aldehyde            | 5280802   |    |
| Isosyringinoside            | 57399043  |    |
| Erigeside C                 | 14132346  |    |
| Coniferaldehyde             | 5280536   |    |
| Coniferyl alcohol           | 1549095   |    |
| p-Coumaric acid             | 637542    |    |
| Caffeic acid methyl ester   | 689075    |    |
| Coniferin                   | 5280372   |    |
| Magnolianone                | 16739270  |    |
| O-methyleugenol             | 7127      |    |
| Chavicol                    | 68148     |    |
| p-Hydroxybenzaldehyde       | 126       |    |
| Loliolide                   | 100332    |    |
| Blumenol A                  | 5280462   |    |
| Blumenol B                  | 14135402  |    |
| S-(+)-dehydrovomifoliol     | 688492    |    |
| Grasshopper ketone          | 13922639  |    |
| (S)-tembetarine             | 167718    |    |
| Reticuline                  | 439653    |    |
| Magnoflorine                | 73337     |    |
| (+)-Laurifoline             | 12305611  |    |
| (+)-Menisperine             | 30358     |    |
| (+)-Xanthoplanine           | 5315336   | 64 |
| Asimilobine                 | 160875    |    |
| Lysicamine                  | 122691    |    |
| Roemerine                   | 119204    |    |
| Anonaine                    | 160597    |    |
| Anolobine                   | 164710    |    |
| Liriodenine                 | 10144     |    |
| Nornantenine                | 3084228   |    |
| Anaxagoreine                | 13891860  |    |
| N-nornuciferine             | 12313579  |    |
| 10-demethylcryptaustoline   | 100969440 |    |
| N-methylisosalsoline        | 40091     |    |
| N-Feruloylputrescine(trans) | 92339985  |    |
| Indole-3-aldehyde           | 10256     |    |
| Betaine                     | 247       |    |
| Limonene                    | 22311     |    |
| Caryophyllene               | 5281515   |    |
| Caryophyllene epoxide       | 14350     |    |
| β-eudesmol                  | 91457     | 64 |
| γ-eudesmol                  | 6432005   |    |
| Cryptomeridiol              | 165258    |    |
| β-sitostenone               | 60123241  |    |
| Stigmasta- 4,22-dien- 3-one | 6442194   |    |
| Hyperoside                  | 5281643   |    |
| Afzelin                     | 5316673   |    |
| Choerospondin               | 157745    |    |

|     |                                |                                         |           |    |
|-----|--------------------------------|-----------------------------------------|-----------|----|
| 25. | Ophiopogon japonicus<br>(30)   | Isorhamnetin- 3-O- $\beta$ -D-glucoside | 5318645   | 65 |
|     |                                | Choerospondin                           | 157745    |    |
|     |                                | Ethyl palmitate (Ethyl hexadecanoate)   | 12366     |    |
|     |                                | Ethyl stearate (Ethyl octadecanoate)    | 8122      |    |
|     |                                | Arachidic acid (Icosanoic acid)         | 10467     |    |
|     |                                | 1-hexacosanol (hexacosan-1-ol)          | 68171     |    |
|     |                                | Palmitone (hentriacontan-16-one)        | 94741     |    |
|     |                                | Nonacosylic acid (Nonacosanoic acid)    | 20245     |    |
|     |                                | glycoside C                             | 44566500  |    |
|     |                                | nolinospiroside F                       | 86289919  |    |
|     |                                | ophiopogonin B                          | 46173857  |    |
|     |                                | ophiopogonin D                          | 46173859  |    |
|     |                                | ophiopogonin A                          | 46173858  |    |
|     |                                | diosgenin                               | 99474     |    |
|     |                                | ophiopogonin C'                         | 4483248   |    |
|     |                                | ophiopogonin D'                         | 10033524  |    |
|     |                                | ophiopogonin P                          | 102195415 |    |
|     |                                | ophiopogonin Q                          | 71522132  |    |
|     |                                | sprengerinin A                          | 102081298 |    |
|     |                                | cixiophiopogon A                        | 102004869 |    |
|     |                                | ophiopo japonin C                       | 146160153 |    |
|     |                                | ophiopogonin R                          | 71523896  |    |
|     |                                | ophiopogonin S                          | 71523897  |    |
|     |                                | prazerigenin A                          | 13833781  |    |
|     |                                | methylophiopogonone B                   | 23259413  | 65 |
|     |                                | ophiopogonone B                         | 14826840  | 65 |
|     |                                | methylophiopogonone A                   | 10065830  | 65 |
|     |                                | 6-aldehydo-isoophiopogonone A           | 5317207   | 65 |
|     |                                | ophiopogonone A                         | 10087732  | 65 |
|     |                                | ophiopogonone C                         | 11142766  | 65 |
|     |                                | ophiopogonanone E                       | 5316797   | 65 |
|     |                                | methylophiopogonanone B                 | 46886723  | 65 |
|     |                                | methylophiopogonanone A                 | 5319741   | 65 |
|     |                                | ophiopogonanone A                       | 9996586   | 65 |
|     |                                | ophiopogonanone C                       | 10871974  | 65 |
|     |                                | Cryptomeridiol                          | 165258    | 66 |
|     |                                | Pennogenin                              | 12314056  | 66 |
|     |                                | Sprengerinin C                          | 44583957  | 66 |
| 26. | Perilla frutescens L.<br>(200) | 3-Epicorosolic acid                     | 15917998  | 67 |
|     |                                | 3-Epimaslinic acid                      | 25564831  |    |
|     |                                | Augustic acid                           | 15560128  |    |
|     |                                | Corosolic acid                          | 6918774   |    |
|     |                                | Hyptadienic acid                        | 14605533  |    |
|     |                                | Pomolic acid                            | 382831    |    |
|     |                                | Tormentic acid                          | 73193     |    |
|     |                                | Triacylglycerol                         | 11146     |    |
|     |                                | Pentadecanoic acid                      | 13849     |    |
|     |                                | Stearic acid                            | 5281      |    |
|     |                                | $\beta$ -Cholesterol                    | 6665      |    |
|     |                                |                                         |           |    |

|                                          |           |
|------------------------------------------|-----------|
| Docosanol                                | 12620     |
| Eicosanol                                | 12404     |
| Heneicosanol                             | 85014     |
| Heptacosanol                             | 74822     |
| Hexacosanol                              | 68171     |
| Octacosanol                              | 68406     |
| Tetracosanol                             | 10472     |
| Triacontanol                             | 68972     |
| Tricosanol                               | 18431     |
| $\beta$ -Tocopherol                      | 6857447   |
| $\gamma$ -Tocopherol                     | 92729     |
| $\delta$ -Tocopherol                     | 92094     |
| Rosmarinic acid methyl ester             | 3012090   |
| Apigenin 7-O-glucuronide                 | 5319484   |
| Apigenin 7-O-diglucuronide               | 126843388 |
| Cimidahurinine                           | 5315870   |
| Chrysoeriol                              | 5280666   |
| Luteolin 7-O-diglucuronide               | 146036993 |
| Luteolin 7-O-glucoside                   | 5280637   |
| Luteolin 7-O-glucuronide                 | 5280601   |
| Luteolin-5-O-glucoside                   | 5317471   |
| Scutellarein                             | 5281697   |
| Chrysotenenin                            | 197081    |
| Cyanin                                   | 441688    |
| Malonylshisonin                          | 11972402  |
| Shisonin                                 | 5282068   |
| (E,E)- $\alpha$ -Farnesene               | 5281516   |
| (Z)-3-Hexenyl acetate                    | 5363388   |
| (Z,E)- $\alpha$ -Farnesene               | 5362889   |
| 1,10-Decanediol                          | 37153     |
| 1,2-Benzenedicarboxylic acid             | 1017      |
| 1,6-Cyclodecadiene                       | 5365639   |
| 10-Undecyn-1-ol                          | 76015     |
| 1-Cyclohexene-1-methanol                 | 317542    |
| 1-Octen-3-ol                             | 18827     |
| 2,2-Dimethylpentane                      | 11542     |
| 2,4,6-Triisopropylphenol                 | 82158     |
| 2,4-Hexadienal                           | 637564    |
| 2-Acetyl-5-methyl furan                  | 14514     |
| 2-Acetylfuran                            | 14505     |
| 2-Butylamine                             | 24874     |
| 2-Cyclopentenone                         | 13588     |
| 2-Ethyladamantane                        | 139758    |
| 2-Hexanoylfuran                          | 61738     |
| 2-Hexenal                                | 5281168   |
| 2-Hydroxypyridine                        | 8871      |
| 2-Isopropylidene-3-methylhexa-3,5-dienal | 5368460   |
| 2-Methoxy-3-propenyl-phenol              | 74069607  |
| 2-Methyl-2-cyclopentenone                | 14266     |
| 2-Methylcyclopentanone                   | 14265     |

|                                  |          |
|----------------------------------|----------|
| 2-Nonyne                         | 140536   |
| 3,5-Diethyl-toluene              | 16302    |
| 3-Octanol                        | 11527    |
| 4,4-Dimethyl-2-cyclopenten-1-one | 140955   |
| 4-Tert-pentylphenol              | 6643     |
| Acetophenone                     | 7410     |
| Acetyl eugenol                   | 7136     |
| a-Cubebene                       | 86609    |
| Alloaromadendrene                | 91354    |
| All-trans-squalene               | 638072   |
| Anisole                          | 7519     |
| Apiol                            | 10659    |
| Asarone                          | 636822   |
| a-Terpinyl acetate               | 111037   |
| Benzene acetaldehyde             | 998      |
| Bornyl acetate                   | 6448     |
| Cadina-3,9-diene                 | 10657    |
| Calarene                         | 28481    |
| Camphane                         | 92108    |
| Carvone                          | 7439     |
| Caryophyllene                    | 5281515  |
| Caryophyllene oxide              | 1742210  |
| cis-Asarone                      | 5281758  |
| cis-Geraniol                     | 643820   |
| cis-Lanceol                      | 6536796  |
| cis-Nerolidol                    | 5320128  |
| cis-Ocimene                      | 5320250  |
| cis-Verbenol                     | 164888   |
| Cosmene                          | 5368451  |
| Cuminaldehyde                    | 326      |
| Curlone                          | 196216   |
| Cycloheptane                     | 9265     |
| Cyclohexanone                    | 7967     |
| Decane                           | 15600    |
| Dihydrocarveol                   | 12072    |
| Dihydrocarveol acetate           | 30248    |
| Dodecane                         | 8182     |
| Egomaketone                      | 42978    |
| Elemicin                         | 10248    |
| Elixene                          | 94254    |
| Elsholtziaketone                 | 521240   |
| Eremophilene                     | 12309744 |
| Eucalyptol                       | 2758     |
| Farnesol                         | 445070   |
| Furfuryl alcohol                 | 7361     |
| Geraniol                         | 637566   |
| Germacrene D                     | 5317570  |
| Germacrene D-4-ol                | 5352847  |
| Heneicosane                      | 12403    |
| Hexadecane                       | 11006    |



---

|                           |          |
|---------------------------|----------|
| Hexahydrofarnesyl acetone | 10408    |
| Humulene epoxide II       | 10704181 |
| Isobornyl acetate         | 247573   |
| Isocaryophyllene          | 5281522  |
| Isoegomaketone            | 5318556  |
| Isoelemicin               | 5318557  |
| Isoeugenol                | 853433   |
| Isolimonene               | 521268   |
| Isomenthone               | 6986     |
| Isopulegone               | 34645    |
| Limonene oxide            | 91496    |
| Limonene oxide, trans     | 8029780  |
| Linalool oxide trans      | 6432254  |
| Linalyl oxide cis         | 6428573  |
| Longifolene               | 289151   |
| Longipinocarvone          | 535296   |

---

|                     |         |
|---------------------|---------|
| Massoia lactone     | 39914   |
| Menthol             | 1254    |
| Menthone            | 26447   |
| Methyl chavicol     | 8815    |
| Methyl eugenol      | 7127    |
| Methyl geranate     | 5365910 |
| Methyl isoeugenol   | 7128    |
| Methyl thymyl ether | 14104   |
| M-Mentha-6,8-diene  | 102625  |
| Naginata ketone     | 564412  |
| Nerol acetate       | 1549025 |
| n-Heptadecane       | 12398   |
| Nonacosane          | 12409   |
| Nonane              | 8141    |
| n-Tricosane         | 12534   |
| Octacosane          | 12408   |
| Patchoulane         | 29408   |
| p-Cymene            | 7463    |
| Pentacosane         | 12406   |
| Perilla ketone      | 68381   |
| Perillaldehyde      | 16441   |
| Perillene           | 68316   |

---

|                    |         |
|--------------------|---------|
| Perillic acid      | 1256    |
| Perillyl alcohol   | 10819   |
| Piperitenone       | 381152  |
| p-Menth-1-en-4-ol  | 11230   |
| p-Menth-1-en-8-ol  | 17100   |
| p-Mentha-3,8-diene | 521851  |
| Pulegone           | 442495  |
| Phytol             | 5280435 |
| Phytone            | 10408   |
| Sabinene           | 18818   |
| Santolina triene   | 519872  |
| Spathulenol        | 92231   |

---

|  |  |                                       |          |    |
|--|--|---------------------------------------|----------|----|
|  |  | Terpinen-4-ol                         | 11230    |    |
|  |  | Terpinolene                           | 11463    |    |
|  |  | Thujyl alcohol                        | 10550    |    |
|  |  | trans-Nerolidol                       | 5284507  |    |
|  |  | trans-Shisool                         | 519954   |    |
|  |  | Triacontane                           | 12535    |    |
|  |  | Tridecane                             | 12388    |    |
|  |  | Valencene                             | 9855795  |    |
|  |  | Valeric acid, pent-2-en-4-ynyl ester  | 5353036  |    |
|  |  | Viridiflorene                         | 10910653 |    |
|  |  | Viridiflorol                          | 11996452 |    |
|  |  | $\alpha$ -Bulnesene                   | 520826   |    |
|  |  | $\alpha$ -Cadinol                     | 10398656 |    |
|  |  | $\alpha$ -Caryophyllene               | 5281520  |    |
|  |  | $\alpha$ -Citral                      | 638011   |    |
|  |  | $\alpha$ -Copaene                     | 70678558 |    |
|  |  | $\alpha$ -Farnesene                   | 5281516  |    |
|  |  | $\alpha$ -Fenchene                    | 12309839 |    |
|  |  | $\alpha$ -Patchoulene                 | 521710   |    |
|  |  | $\alpha$ -Santalol                    | 5281531  |    |
|  |  | $\beta$ -Cubebene                     | 93081    |    |
|  |  | $\beta$ -Bourbonene                   | 324224   |    |
|  |  | $\beta$ -Cadinene                     | 10657    |    |
|  |  | $\beta$ -Cyclocitral                  | 9895     |    |
|  |  | $\beta$ -Elemene                      | 6918391  |    |
|  |  | $\beta$ -Farnesene                    | 5281517  |    |
|  |  | $\beta$ -Guaiene                      | 6949     |    |
|  |  | $\beta$ -Gurjunene                    | 6450812  |    |
|  |  | $\beta$ -Ionone                       | 638014   |    |
|  |  | $\beta$ -Pinene                       | 14896    |    |
|  |  | $\beta$ -Selinene                     | 442393   |    |
|  |  | $\beta$ -Phellandrene                 | 11142    |    |
|  |  | $\beta$ -Terpinene                    | 66841    |    |
|  |  | $\gamma$ -Pyronene                    | 578237   |    |
|  |  | $\delta$ -Cadinene                    | 441005   |    |
|  |  | $\delta$ -Elemene                     | 12309449 | 67 |
|  |  | Methyl- $\alpha$ -D-fructofuranoside  | 6325664  | 68 |
|  |  | Methyl- $\beta$ -D-fructofuranoside   | 128889   | 68 |
|  |  | 3,5-Di-O-caffeoylquinic acid          | 6474310  | 68 |
|  |  | Pimaric acid                          | 220338   | 69 |
|  |  | (-)-Kaur-16-en-19-oic acid            | 73062    | 69 |
|  |  | Falcarindiol                          | 5281148  | 69 |
|  |  | 17-Hydroxy-ent-kaur-15-en-19-oic acid | 169654   | 69 |
|  |  | Alpha-mono palmitin                   | 14900    | 69 |
|  |  | Kaurenoic acid                        | 73062    | 70 |
|  |  | Continentalic acid                    | 10086296 | 70 |
|  |  | Neomangiferin                         | 6918448  |    |
|  |  | Mangiferin                            | 5281647  |    |
|  |  | Isomangiferin                         | 5318597  | 71 |
|  |  | Vitexin                               | 5280441  |    |

|  |  |                                          |           |    |
|--|--|------------------------------------------|-----------|----|
|  |  | Isosakuranetin                           | 160481    |    |
|  |  | Macrostemonoside J                       | 101669618 |    |
|  |  | Asparagosome G                           | 3042722   |    |
|  |  | Tomatoside A                             | 426059    |    |
|  |  | Timosaponin BII                          | 44575945  |    |
|  |  | Officinalisinin-I                        | 441889    |    |
|  |  | Timosaponin D                            | 132545772 |    |
|  |  | Filicinoside-A                           | 190854    |    |
|  |  | Timosaponin F                            | 101005526 |    |
|  |  | Anemarrhenasaponin I                     | 101672279 |    |
|  |  | Anemarrhenasaponin II                    | 101672380 |    |
|  |  | Anemarrhenasaponin III                   | 101672280 |    |
|  |  | F-gitonin                                | 44559009  |    |
|  |  | Timosaponin AIV                          | 154572708 |    |
|  |  | Timosaponin AIII                         | 15953793  |    |
|  |  | Desgalactotigonin                        | 162401    |    |
|  |  | Timosaponin AI                           | 71767755  |    |
|  |  | cis-hinokiresinol                        | 5281830   |    |
|  |  | monomethyl-cis-hinokiresinol             | 5319736   |    |
|  |  | Foliamangiferoside A                     | 46206548  |    |
|  |  | 2,6,4'-trihydroxy-4- methoxybenzophenone | 10467773  |    |
|  |  | Phytosphingosine                         | 122121    |    |
|  |  | Dimethisterone                           | 6607      |    |
|  |  | Macrostemonoside F                       | 192523    | 72 |
|  |  | Platycodin D                             | 162859    | 72 |
|  |  | Platycoside A                            | 50900942  | 72 |
|  |  | Platycodin D2                            | 53317652  | 72 |
|  |  | Polygalacin D2                           | 53325781  | 72 |
|  |  | Platycodin D3                            | 70698293  | 72 |
|  |  | trans-Hinokiresinol                      | 12310493  | 72 |
|  |  | Isosarsasapogenin                        | 91439     | 73 |
|  |  | Markogenin                               | 12304414  | 73 |
|  |  | Neogitogenin                             | 12304409  | 73 |
|  |  | Sarsasapogenin                           | 92095     | 73 |
|  |  | Diosgenin                                | 99474     | 73 |
|  |  | Arctigenin                               | 64981     | 74 |
|  |  | Arctiin                                  | 100528    | 74 |
|  |  | Trachelogenin                            | 452855    | 74 |
|  |  | Lappaol F                                | 73425459  | 74 |
|  |  | Diartigenin                              | 16215736  | 74 |
|  |  | Methyl palmitate                         | 8181      | 75 |
|  |  | Methyl linoleate                         | 5284421   | 75 |
|  |  | Methyl oleate                            | 5364509   | 75 |
|  |  | Hexanal                                  | 6184      |    |
|  |  | Benzeneacetaldehyde                      | 998       |    |
|  |  | cis-Sabinene hydrate                     | 101629835 |    |
|  |  | trans-Sabinene hydrate                   | 12315151  | 76 |
|  |  | cis-Verbenol                             | 164888    |    |
|  |  | trans-Verbenol                           | 89664     |    |
|  |  | cis-Chrysanthanol                        | 527032    |    |

|     |                  |                                                    |           |    |
|-----|------------------|----------------------------------------------------|-----------|----|
|     |                  | Verbenone                                          | 29025     |    |
|     |                  | Chrysanthenyl acetate                              | 162747    |    |
|     |                  | Lavandulyl acetate                                 | 30247     |    |
|     |                  | Silphiperfol-5-ene                                 | 91747334  |    |
|     |                  | Germacrene D                                       | 5317570   |    |
|     |                  | Zingiberene                                        | 92776     |    |
|     |                  | Germacrene D 4-ol                                  | 5352847   |    |
|     |                  | Neophytadiene                                      | 10446     |    |
|     |                  | Hexadecanoic acid                                  | 985       |    |
|     |                  | Phytol                                             | 5280435   |    |
|     |                  | Nonacosane                                         | 12409     |    |
|     |                  | Hentriacontane                                     | 12410     |    |
|     |                  | Dotriacontane                                      | 11008     |    |
|     |                  | Tritriacontane                                     | 12411     |    |
|     |                  | Isolariciresinol                                   | 160521    | 77 |
|     |                  | isolariciresinol 9-O-beta-D-glucopyranoside        | 85210374  | 77 |
|     |                  | pinoresinol-4-O-beta-D glucoside                   | 486614    | 77 |
|     |                  | dehydrodiconiferyl alcohol 4-O-b-D-glucopyranoside | 5316442   | 77 |
|     |                  | neo-olivil                                         | 9976812   | 77 |
|     |                  | medioresinol                                       | 181681    | 77 |
|     |                  | americanol A                                       | 637304    | 77 |
|     |                  | pinoresinol                                        | 73399     | 77 |
|     | Pinellia ternate | burselignan                                        | 11631864  | 77 |
|     |                  | L-Ephedrine                                        | 9294      | 78 |
| 31. |                  | Inosine                                            | 135398641 | 78 |
|     | (75)             | Cytidine                                           | 6175      | 78 |
|     |                  | Pedatisectine B                                    | 190       | 78 |
|     |                  | 8-Octadecenoic acid                                | 5282758   | 78 |
|     |                  | Pentadecanoic acid                                 | 13849     | 78 |
|     |                  | 9-Hexadecenoic acid                                | 5282745   | 78 |
|     |                  | Hexadecanoic acid                                  | 985       | 78 |
|     |                  | Heptadecanoic acid                                 | 10465     | 78 |
|     |                  | 7-Hexadecenoic acid                                | 543268    | 78 |
|     |                  | Octadecanoic acid                                  | 5281      | 78 |
|     |                  | 9-Oxo-nonanoic acid                                | 75704     | 78 |
|     |                  | 11-Eicosenoic acid                                 | 5282768   |    |
|     |                  | Eicosanoic acid                                    | 10467     |    |
|     |                  | 10,13-Eicosadienoic acid                           | 72444876  |    |
|     |                  | Docosanoic acid                                    | 8215      |    |
|     |                  | Pinellic acid                                      | 9858729   |    |
|     |                  | Succinic acid                                      | 1110      |    |
|     |                  | 3-Methyleicosane                                   | 98417     | 78 |
|     |                  | 3-Decyne                                           | 75425     |    |
|     |                  | 2-Methyldecane                                     | 23415     |    |
|     |                  | Octadecane                                         | 11635     |    |
|     |                  | 2,6,10-Trimethyltetradecane                        | 85785     |    |
|     |                  | 2,5-Dimethyltetradecane                            | 41836     |    |
|     |                  | Vinylcyclohexane                                   | 12757     |    |
|     |                  | 1-Octene                                           | 8125      |    |

|     |                                          |                |             |
|-----|------------------------------------------|----------------|-------------|
|     | 6-Methyl-2-heptanone                     | 13572          |             |
|     | 3-Nonanone                               | 61235          |             |
|     | Cis-4-decenal                            | 5362620        |             |
|     | 2-Undecanone                             | 8163           |             |
|     | 9-Heptadecanol                           | 136435         |             |
|     | Anethole                                 | 637563         |             |
|     | Citronellal                              | 7794           |             |
|     | Aromandendrene                           | 91354          |             |
|     | Farnesane                                | 19773          |             |
|     | $\beta$ -Patchoulene                     | 101731         |             |
|     | $\alpha$ -Elemol                         | 92138          |             |
|     | 1-Methyl-4-(1-methylethenyl)-cyclohexene | 6453304        |             |
|     | Dibutyl phthalate                        | 3026           |             |
|     | 2,6-Di-tert-butyl-4-methylphenol         | 31404          |             |
|     | 2-Pentylfuran                            | 19602          |             |
|     | Furfural                                 | 7362           |             |
|     | 2,4-Dimethyl furan                       | 19462          |             |
|     | Anisic acid                              | 7478           |             |
|     | Pulegone                                 | 442495         |             |
|     | Isopulegol                               | 170833         |             |
|     | 3-Nonyne                                 | 140649         |             |
|     | 2-Methylnonane                           | 13379          |             |
|     | 3,4-Dihydroxycinnamyl alcohol            | 5282096        |             |
|     | Sachaliside 1                            | 14048613       |             |
|     | Stigmast-4-en-3-one                      | 5484202        |             |
|     | Cycloartenol                             | 92110          |             |
|     | Protocatechuic aldehyde                  | 8768           |             |
|     | Shogaol                                  | 5281794        | 78          |
|     | Gingerol                                 | 442793         |             |
|     | Erythritol                               | 222285         |             |
|     | Melissane                                | 182192         |             |
|     | Nonacosane                               | 12409          |             |
|     | Homogentisic acid                        | 780            |             |
|     | Benzene-1,4-diol                         | 785            |             |
|     | Benzene-1,2-diol                         | 289            |             |
|     | Monogalactosyldiacylglycerol             | 90657729       |             |
|     | Soyacerebroside I                        | 11104507       |             |
|     | Soyacerebroside II                       | 15599558       |             |
|     | N-acetylglutamate                        | 70914          |             |
|     | Platycoside A                            | 50900942       |             |
|     | Platycoside B                            | 101937508      |             |
|     | Platycoside C                            | 101937509      |             |
|     | Platycoside D                            | 100974704      |             |
|     | Platycoside E                            | 70698202       |             |
| 32. | Platycodon grandifloras                  | Platycoside G1 | 70698289 79 |
|     | (55)                                     | Platycoside F  | 101048500   |
|     |                                          | Platycoside G2 | 102217526   |
|     |                                          | Platycoside G3 | 70698263    |
|     |                                          | Platycoside H  | 11665339    |
|     |                                          | Platycoside I  | 11622299    |

|                                              |           |    |
|----------------------------------------------|-----------|----|
| Platycoside J                                | 11528185  |    |
| Platycoside K                                | 102004765 |    |
| Platycoside L                                | 11556931  |    |
| Platycoside M-1                              | 101403595 |    |
| Platycoside M-2                              | 101403596 |    |
| Platycoside M-3                              | 101403597 |    |
| Platycodin A                                 | 46173910  |    |
| Platycodin C                                 | 46173919  |    |
| Platycodin D                                 | 162859    |    |
| Deapioplatycodin D                           | 70698266  |    |
| Platycodin D2                                | 53317652  |    |
| Deapioplatycodin D2                          | 50900942  |    |
| Platycodin J                                 | 102052427 |    |
| Platycodin K                                 | 102052428 |    |
| Platycodin L                                 | 102052429 |    |
| 3-O- $\beta$ -D-glucopyranosylplatycodigenin | 102185205 |    |
| Polygalacin D                                | 46173909  |    |
| 20-O-acetylPolygalacin D                     | 53321792  |    |
| 30-O-acetylPolygalacin D                     | 53321793  |    |
| Polygalacin D2                               | 53325781  |    |
| 30-O-acetylPolygalacin D2                    | 53321794  |    |
| Platyconic acid A                            | 70698300  |    |
| Platyconic acid B lactone                    | 50900852  |    |
| Deapioplatyconic acid B lactone              | 50900941  | 79 |
| Platycogenic acid A                          | 20056221  |    |
| Platyconic acid B                            | 101495504 |    |
| Platyconic acid C                            | 102052424 |    |
| Platyconic acid D                            | 102052425 |    |
| Platyconic acid E                            | 102052426 |    |
| Platycogenic acid B                          | 69570716  |    |
| Platycogenic acid C                          | 69569686  |    |
| Platyconin                                   | 90659256  |    |
| (2R, 3R) taxifolin                           | 439533    | 79 |
| quercetin-7-O-glucoside                      | 5282160   | 79 |
| quercetin-7-O-rutinoside                     | 101764560 | 79 |
| luteolin-7-O-glucoside                       | 5280637   | 79 |
| apigenin-7-O-glucoside                       | 12304093  | 79 |
| p-hydroxybenzoic acid                        | 135       | 79 |
| 2,3-dihydroxybenzoic acid                    | 19        | 79 |
| 2-hydroxy4-methoxybenzoic acid               | 75231     | 79 |
| homovanillic acid                            | 1738      | 79 |
| spinasterol                                  | 5281331   | 79 |
| botulin                                      | 49895112  | 79 |
| $\delta$ -7-stigmastenone-3                  | 5748344   | 79 |
| Apigenin                                     | 5280443   | 79 |
| Luteolin                                     | 5280445   | 79 |
| Platycoside                                  | 101403597 | 79 |
| Flavoplatycoside                             | 10416329  | 79 |
| 3,4-dimethoxycinnamic acid                   | 717531    | 79 |
| Isoferulic acid                              | 736186    | 79 |

|     |      |                     |                                           |           |    |
|-----|------|---------------------|-------------------------------------------|-----------|----|
| 33. | (45) | Rehmannia glutinosa | m-coumaric acid                           | 637541    | 79 |
|     |      |                     | p-coumaric acid                           | 637542    | 80 |
|     |      |                     | $\alpha$ -resorcylic acid                 | 7424      | 80 |
|     |      |                     | Chlorogenic acid                          | 1794427   | 80 |
|     |      |                     | Lobetyolin                                | 53486204  | 80 |
|     |      |                     | Lobetyolinin                              | 5459227   | 80 |
|     |      |                     | Iobetyol                                  | 5807986   | 80 |
|     |      |                     | Betulin                                   | 72326     | 80 |
|     |      |                     | $\beta$ -sitosterol                       | 521199    | 80 |
|     |      |                     | Inulin                                    | 24763     | 80 |
|     |      |                     | Grandoside                                | 10341593  | 80 |
|     |      |                     | Lariciresinol                             | 332427    | 81 |
|     |      |                     | hierochin D                               | 85382912  | 81 |
|     |      |                     | yemuoside 1                               | 195850    | 81 |
|     |      |                     | darendoside B                             | 21668724  | 81 |
|     |      |                     | decaffeoyl acteoside                      | 13889681  | 81 |
|     |      |                     | jionoside B <sub>1</sub>                  | 5281782   | 81 |
|     |      |                     | <a href="#">catalpol</a>                  | 91520     | 81 |
|     |      |                     | ajugol                                    | 6325127   | 81 |
|     |      |                     | 6-O-vanilloylajugol                       | 14396664  | 81 |
|     |      |                     | 6-O-E-feruloylajugol                      | 6325178   | 81 |
|     |      |                     | Rehmapicroside                            | 21637711  | 81 |
|     |      |                     | Rehmapicrogenin                           | 15693863  | 82 |
|     |      |                     | hydroferulic acid                         | 14340     | 82 |
|     |      |                     | aucubin                                   | 91458     | 82 |
|     |      |                     | isoacteoside                              | 6476333   | 82 |
|     |      |                     | acteoside                                 | 5281800   | 82 |
|     |      |                     | ethyl $\beta$ -D-fructofuranoside         | 138113708 | 82 |
|     |      |                     | eleutheroside C                           | 9859136   | 82 |
|     |      |                     | mannitol                                  | 6251      | 82 |
|     |      |                     | raffinose                                 | 439242    | 82 |
|     |      |                     | stachyose                                 | 439531    | 82 |
|     |      |                     | glutinolic acid                           | 53248310  | 82 |
|     |      |                     | paulownin                                 | 3084131   | 82 |
|     |      |                     | monopalmitin                              | 14900     | 82 |
|     |      |                     | pinellic acid                             | 9858729   | 82 |
|     |      |                     | jio-cerebroside                           | 10169092  | 82 |
|     |      |                     | aeginetic acid 5-O-beta-D-quinovoside     | 53248311  | 83 |
|     |      |                     | aeginetoyl ajugol 5"-O-beta-D-quinovoside | 101790066 | 83 |
|     |      |                     | rehmaionoside A                           | 10023290  | 83 |
|     |      |                     | dihydroxy-beta-ionone                     | 15693868  | 83 |
|     |      |                     | rehmaglutin D                             | 5320906   | 83 |
|     |      |                     | ajugoside                                 | 9865184   | 83 |
|     |      |                     | martynoside                               | 5319292   | 84 |
|     |      |                     | leucosceptoside A                         | 10394343  | 84 |
|     |      |                     | 5-hydroxymethyl furfural                  | 237332    | 84 |
|     |      |                     | Tyrosol                                   | 10393     | 84 |
|     |      |                     | Isomartynoside                            | 91895373  | 84 |
|     |      |                     | purpureaside C                            | 11953944  | 84 |
|     |      |                     | jionoside A1                              | 6325450   | 84 |

|                          |                                           |           |    |
|--------------------------|-------------------------------------------|-----------|----|
|                          | ferulic acid methyl ester                 | 5357283   | 85 |
|                          | coniferin                                 | 5280372   | 85 |
|                          | leonoside F                               | 57325811  | 85 |
|                          | echinacoside                              | 5281771   | 85 |
|                          | diincarvilone A                           | 60155233  | 85 |
|                          | pterolactam                               | 181561    | 85 |
|                          | 3-indolecarboxylic acid                   | 69867     | 85 |
|                          | Ledebouriellol                            | 5318962   | 86 |
|                          | Hamaudol                                  | 164722    |    |
|                          | sec-O-glucosylhamaudol                    | 10478277  |    |
|                          | Divaricatol                               | 9974111   |    |
|                          | Cimifugin                                 | 441960    |    |
|                          | prim -O – glucosylcimifugin               | 14034912  |    |
|                          | 5-O-methylvisamminol                      | 441970    |    |
|                          | 4'-O-β-D-glucosyl-5-O-methylvisamminol    | 21670038  |    |
|                          | Norcimifugin                              | 46240156  |    |
|                          | undulatoside A                            | 5321494   |    |
|                          | wogonin                                   | 5281703   |    |
|                          | bergapten                                 | 2355      |    |
|                          | byakangelicin                             | 10211     |    |
|                          | deltoid                                   | 906525    |    |
|                          | imperatorin                               | 10212     |    |
|                          | isoimperatorin                            | 68081     |    |
|                          | isobergapten                              | 68082     |    |
|                          | marmesin                                  | 334704    |    |
|                          | nodakenetin                               | 26305     |    |
| Saposhnikovia divaricate | oxypeucedanin hydrate                     | 17536     |    |
|                          | phellopterin                              | 98608     |    |
|                          | psoralen                                  | 6199      |    |
|                          | xanthotoxin                               | 4114      |    |
| (45)                     | 5-hydroxy-8-methoxypsoralen               | 5385192   |    |
|                          | Nodakenin                                 | 73191     |    |
|                          | Xanthoarnol                               | 11482406  |    |
|                          | Fraxidin                                  | 3083616   |    |
|                          | Isofraxidin                               | 5318565   |    |
|                          | Scopoletin                                | 5280460   |    |
|                          | Umbelliferone                             | 5281426   |    |
|                          | Anomalin                                  | 10251869  |    |
|                          | Decursinol                                | 442127    |    |
|                          | decursinol angelate                       | 776123    |    |
|                          | praeruptorin B                            | 5319259   |    |
|                          | praeruptorin F                            | 51668830  |    |
|                          | cis-3', 4'-diseneciokhellactone           | 1119128   |    |
|                          | (-)-cis-khellactone                       | 455821    |    |
|                          | (3'S)-hydroxydeltoid                      | 455821    |    |
|                          | Panaxynol                                 | 5281149   |    |
|                          | Falcarindiol                              | 5281148   |    |
|                          | (9Z)-1-methoxy9-heptadecene-4,6-diyn-3-ol | 146026404 |    |
|                          | Marmesinin                                |           |    |
|                          | tectochrysin                              | 216283    |    |



|     |                               |                                             |           |    |
|-----|-------------------------------|---------------------------------------------|-----------|----|
|     |                               | glyceryl monooleate                         | 5281954   |    |
|     |                               | 8'-epicleomiscosin A                        | 5283468   |    |
| 35. | Glycyrrhiza uralensis<br>(30) |                                             | 11200016  | 86 |
|     |                               | lignoceric acid                             | 11197     |    |
|     |                               | licorisoflavan A                            | 196831    |    |
|     |                               | methoxyficifolinol                          | 480872    |    |
|     |                               | docosanol                                   | 12620     |    |
|     |                               | betulinic acid                              | 64971     |    |
|     |                               | licoricidin                                 | 480865    |    |
|     |                               | kumatakenin                                 | 5318869   |    |
|     |                               | docosyl caffeate                            | 5316952   |    |
|     |                               | neoglycyrol                                 | 5320083   |    |
|     |                               | gancaonin H                                 | 5481949   |    |
|     |                               | isoglycyrol                                 | 124050    |    |
|     |                               | liquiritigenin                              | 114829    |    |
|     |                               | lupiwighteone                               | 5317480   |    |
|     |                               | 3R-vestitol                                 | 439310    |    |
|     |                               | Echinatin                                   | 6442675   | 87 |
|     |                               | Glycycoumarin                               | 5317756   |    |
|     |                               | Licoarylcoumarin                            | 10090416  |    |
|     |                               | 7,2',4'-trihydroxy-5-methoxy-3-arylcoumarin | 25015742  |    |
|     |                               | Glicoricone                                 |           |    |
|     |                               | Isoliquiritigenin                           | 10361658  |    |
|     |                               | Formononetin                                | 638278    |    |
|     |                               | Licoricone                                  | 5280378   |    |
|     |                               | Glycyrin                                    | 5319013   |    |
|     |                               | formononetin-7-O- $\beta$ -D-glucoside      | 480787    |    |
|     |                               | liquiritin                                  | 101350244 |    |
|     |                               | isoliquiritin apioside                      | 503737    |    |
|     |                               | glycyrrhizic acid                           | 6442433   |    |
|     |                               | liquiritin apioside                         | 14982     |    |
|     |                               | hedysarimcoumestan B                        | 10076238  |    |
|     |                               |                                             | 11558452  |    |
| 36. | Ziziphus jujuba<br>(70)       | Mauritine A                                 | 11353668  |    |
|     |                               | Mucronine D                                 | 5373023   |    |
|     |                               | Amphibine H                                 | 51029223  |    |
|     |                               | Nummularine A                               | 131750852 |    |
|     |                               | Nummularine B                               | 51017057  |    |
|     |                               | sativanine-B                                | 5281595   |    |
|     |                               | frangulanine                                | 5281587   |    |
|     |                               | sativanine F                                | 102156891 |    |
|     |                               | coclaurine                                  | 160487    | 88 |
|     |                               | isoboldine                                  | 133323    |    |
|     |                               | norisoboldine                               | 14539911  |    |
|     |                               | asimilobine                                 | 160875    |    |
|     |                               | sanjoinenine                                | 14729078  |    |
|     |                               | amphibine-D                                 | 5318120   |    |
|     |                               | sanjoinine-B                                | 14729076  |    |
|     |                               | sanjoinine-D                                | 44566617  |    |
|     |                               | sanjoinine-F                                | 14729081  |    |

|                                                    |           |    |
|----------------------------------------------------|-----------|----|
| Jubanine-A                                         | 101316794 |    |
| Jubanine-B                                         | 101316795 |    |
| Scutianine-C                                       | 45268911  |    |
| Scutianine-D                                       | 45267179  |    |
| Jubanine-C                                         | 131752168 |    |
| Zizyphine-A                                        | 6324833   |    |
| 6'''- sinapoylspinosin                             | 101616450 | 88 |
| 6'''-feruloylspinosin                              | 21597353  | 88 |
| 6'''-pcoumaroylspinosin                            | 5316122   | 88 |
| jujuboside A                                       | 51346169  | 88 |
| jujuboside B                                       | 24721031  | 88 |
| jujuboside A1                                      | 177396    | 88 |
| jujuboside B1                                      | 73156987  | 88 |
| jujuboside C                                       | 71448946  | 88 |
| acetyljujuboside B                                 | 73093046  | 88 |
| protojujuboside A                                  | 71448943  | 88 |
| protojujuboside B                                  | 71448944  | 88 |
| protojujuboside B1                                 | 71448945  | 88 |
| Puerarin                                           | 5281807   | 88 |
| 6'''-feruloylisospinosin                           | 10795344  | 88 |
| Isospinosin                                        | 11801844  | 88 |
| Kaempferol 3-O-robinobioside                       | 15944778  | 88 |
| Kaempferol 3-O-rutinoside                          | 5318767   | 88 |
| colubrinic acid                                    | 21672700  | 88 |
| alphitolic acid                                    | 12305768  | 88 |
| zizyberenalic acid                                 | 15958448  | 88 |
| betulinic acid                                     | 64971     | 88 |
| 3-O-( <i>cis-p</i> -coumaroyl)-alphitolic acid     | 5316118   | 89 |
| 3-beta-O-( <i>trans-p</i> -coumaroyl)maslinic acid | 14335962  | 89 |
| pomonic acid                                       | 12314449  | 89 |
| 2-oxopomolic acid                                  | 44593379  | 89 |
| benthamic acid                                     | 3838010   | 89 |
| terminic acid                                      | 132568257 | 89 |
| traumatic acid                                     | 5283028   | 89 |
| ( <i>Z</i> )-4-oxotetradec-5-enoic acid            | 132568256 | 89 |
| Magnoflorine                                       | 73337     | 89 |
| Franganine                                         | 45270592  |    |
| Spinosyn                                           | 155692    |    |
| 3beta,6beta-stigmast-4-en-3,6-diol                 | 146156493 |    |
| Maslinic acid                                      | 73659     |    |
| Ceanothic acid                                     | 161352    |    |
| Vitexin                                            | 5280441   |    |
| Oleamide                                           | 5283387   |    |
| Ent-epicatechinoceanothic acid A                   | 132967447 | 90 |
| Lupeol                                             | 259846    |    |
| 2-alpha-hydroxyursolic acid                        | 6918774   |    |
| Ziziphin                                           | 441957    |    |
| Squalene                                           | 638072    |    |
| epiceanothic acid                                  | 23631167  |    |
| ceanothenic acid                                   | 71451218  |    |

|     |                 |                                   |           |    |
|-----|-----------------|-----------------------------------|-----------|----|
|     |                 | zizyberanolic acid                | 21672700  |    |
|     |                 | ursonic acid                      | 9890209   |    |
|     |                 | apigenin triacetate               | 18721     |    |
|     |                 | daidzein diacetate                | 10359753  |    |
|     |                 | daidzein dimethyl ether           | 136419    |    |
|     |                 | daidzin                           | 107971    |    |
|     |                 | puerarin                          | 5281807   |    |
|     |                 | daidzein                          | 5281708   |    |
|     |                 | formononetin                      | 5280378   |    |
|     |                 | puerarol                          | 44257531  |    |
|     | Pueraria lobata | 3'-Hydroxypuerarin                | 5748205   |    |
|     |                 | 3'-Methoxydaidzein                | 5319422   |    |
| 37. |                 | 3'-methoxydaidzin                 | 10527347  | 91 |
|     | (50)            | 3'-methoxypuerarin                | 5319485   |    |
|     |                 | 6''-O-D-Xylosylpuerarin           | 101776119 |    |
|     |                 | biochanin A                       | 5280373   |    |
|     |                 | 4'-Methoxypuerarin                | 5319486   |    |
|     |                 | 3'-Methoxypuerarin                | 5319485   |    |
|     |                 | mirificin                         | 21676217  |    |
|     |                 | ononin                            | 442813    |    |
|     |                 | puerarin-4'-O-glucoside           | 44257212  |    |
|     |                 | irisolidone                       | 5281781   |    |
|     |                 | kaikasaponin I                    | 102120183 |    |
|     |                 | soyasaponin I                     | 122097    | 91 |
|     |                 | astragaloside VIII                | 124491170 | 91 |
|     |                 | azukisaponin I                    | 14103656  | 91 |
|     |                 | baptisiasaponin I                 | 102317160 | 91 |
|     |                 | genistein                         | 5280961   | 91 |
|     |                 | genistin                          | 5281377   | 91 |
|     |                 | glycitein                         | 5317750   | 91 |
|     |                 | glycitin                          | 187808    | 91 |
|     |                 | kaikasaponin II                   | 101538997 | 91 |
|     |                 | kaikasaponin III                  | 188384    | 91 |
|     |                 | kakkalide                         | 5490351   | 91 |
|     |                 | kakkasaponin I                    | 100945993 | 91 |
|     |                 | kakkasaponin II                   | 102500447 | 91 |
|     |                 | kakkasaponin III                  | 102500448 | 91 |
|     |                 | luteolin                          | 5280445   | 91 |
|     |                 | phaseoside IV                     | 101679107 | 92 |
|     |                 | soyasaponin IV                    | 24721354  | 92 |
|     |                 | tectorigenin                      | 5281811   | 92 |
|     |                 | tectorigenin-7-O-xylosylglucoside | 100968221 | 92 |
|     |                 | nicotiflorin                      | 5318767   | 92 |
|     |                 | robinin                           | 5281693   | 92 |
|     |                 | beta-sitosterol palmitate         | 13747834  | 92 |
|     |                 | lupeone                           | 92158     | 92 |
|     |                 | diisobutyl phthalate              | 6782      | 92 |
|     |                 | bis(2-ethylhexyl) phthalate       | 8343      | 92 |
|     |                 | sophoracoumestan A                | 14630492  | 92 |
|     |                 | coumestrol                        | 5281707   | 92 |

|     |                               |                                                                |           |    |
|-----|-------------------------------|----------------------------------------------------------------|-----------|----|
| 38. | Coix lacryma-jobi<br>(15)     | allantion                                                      | 439714    | 92 |
|     |                               | Sissotorin                                                     | 73407546  | 92 |
|     |                               | (6S,9R)-roseoside                                              | 9930064   | 92 |
|     |                               | Coixenolide                                                    | 46173943  | 93 |
|     |                               | $\gamma$ -Tocopherol                                           | 14985     | 93 |
|     |                               | Docosanol                                                      | 12620     | 93 |
|     |                               | 4-Ketopinoresinol                                              | 44578390  | 93 |
|     |                               | p-Hydroxy benzaldehyde                                         | 126       | 93 |
|     |                               | Tangeretin                                                     | 68077     | 93 |
|     |                               | Naringenin                                                     | 932       | 93 |
|     |                               | Nobiletin                                                      | 72344     | 93 |
|     |                               | Neolignan                                                      | 261166    | 93 |
|     |                               | 5-Amino-1-(quinolin-8-yl)-1,2,3-triazole-4-carbox-<br>amide    | 26435789  | 94 |
|     |                               | Pyridine                                                       | 1049      | 94 |
|     |                               | Propenamide                                                    | 6579      | 94 |
| 39. | Rheum palmatum<br>(22)        | N-methoxy-N-methyl-3,4-dihydro-2H-thiopy-<br>ran-6-carboxamide | 24813996  | 94 |
|     |                               | 1,3-dioctanoin                                                 | 150911    | 94 |
|     |                               | tetradecanoic acid                                             | 11005     | 94 |
|     |                               | aloe-emodin                                                    | 10207     |    |
|     |                               | chrysophanol                                                   | 10208     |    |
|     |                               | emodin                                                         | 3220      |    |
|     |                               | emodin-6-O-beta-D-glucopyranoside                              | 5317038   |    |
|     |                               | physcion                                                       | 10639     |    |
|     |                               | physcion-8-O-beta-D-glucopyranoside                            | 5319323   |    |
|     |                               | rhein                                                          | 10168     |    |
|     |                               | rhein-8-O-beta-D-glucopyranoside                               | 146156489 |    |
|     |                               | palmidin A                                                     | 5320384   |    |
|     |                               | palmidin B                                                     | 5320385   |    |
|     |                               | palmidin C                                                     | 5320386   |    |
|     |                               | rheinoside A                                                   | 13888123  | 95 |
|     |                               | rheinoside C                                                   | 13888128  |    |
|     |                               | sennidin C                                                     | 5321255   |    |
|     |                               | sennoside A                                                    | 73111     |    |
|     |                               | sennoside B                                                    | 91440     |    |
|     |                               | sennoside C                                                    | 46173829  |    |
|     |                               | sennoside D                                                    | 46173830  |    |
|     |                               | rhapontigenin                                                  | 5320954   |    |
| 40. | Uncaria rhynchophylla<br>(30) | gallic acid 3-O-beta-D-glucopyranoside                         | 101683334 |    |
|     |                               | gallic acid 4-O-beta-D-glucopyranoside                         | 10088114  |    |
|     |                               | coumaroyl-O-galloyl-glucose                                    | 146170723 |    |
|     |                               | Hirsutine                                                      | 3037884   |    |
|     |                               | Hirsuteine                                                     | 3037151   |    |
|     |                               | epi-allo-corynantheine                                         | 101603230 |    |
|     |                               | corynantheidine                                                | 3000341   | 96 |
|     |                               | dihydrocorynantheine                                           | 3039336   |    |
|     |                               | akuammigine                                                    | 1268096   |    |
|     |                               | yohimbine                                                      | 8969      |    |
|     |                               | angustine                                                      | 441983    |    |

|     |                                 |           |    |
|-----|---------------------------------|-----------|----|
|     | angustoline                     | 3084765   |    |
|     | angustidine                     | 3084770   |    |
|     | corynoxine                      | 44568160  |    |
|     | 18,19-dehydrocorynoxinic acid   | 24970642  |    |
|     | Isorhynchophylline              | 3037048   |    |
|     | Isocorynoxine                   | 3037448   |    |
|     | 18,19-dehydrocorynoxinic acid B | 24970641  |    |
|     | cadambine                       | 398038    |    |
|     | 3 Alpha-dihydrocadambine        | 162138    |    |
|     | vincoside lactam                | 44567645  |    |
|     | rhynchophine                    | 11972452  |    |
|     | strictosidine                   | 161336    |    |
|     | strictosamide                   | 10345799  |    |
|     | 6beta-hydroxyursolic acid       | 20055642  |    |
|     | uncarinic acid C                | 44583694  |    |
|     | uncarinic acid D                | 44583694  |    |
|     | uncarinic acid B                | 100967916 |    |
|     | uncarinic acid E                | 10746421  |    |
|     | trifolin                        | 5282149   |    |
|     | hyperin                         | 5281643   |    |
|     | cleomiscosin B                  | 156875    |    |
|     | cleomiscosin D                  | 13965876  |    |
|     | (+)-pinoresinol                 | 73399     |    |
|     | (+)-phillygenin                 | 4166098   |    |
|     | Phillyrin                       | 101712    |    |
|     | (+) epipinoresinol              | 637584    |    |
|     | Pinoresinol                     | 73399     |    |
|     | 8- hydroxypinoresinol           | 3010930   |    |
|     | benzenebutanoic acid            | 4775      |    |
|     | Arctigenin                      | 64981     |    |
|     | (-) dimethylmatairesinol        | 1286      |    |
|     | Arctiin                         | 100528    |    |
|     | (-)- matairesinoside            | 486612    |    |
|     | Olivil                          | 5273570   |    |
|     | (+) lariciresinol               | 332427    |    |
| 41. | forsythialan A                  | 44453412  | 97 |
|     | forsythialan B                  | 44453332  |    |
|     | (-)-egenine                     | 189685    |    |
|     | (-)-bicuculline                 | 185838    |    |
|     | Rutaecarpine                    | 65752     |    |
|     | p-hydroxyphenylacetic acid      | 127       |    |
|     | suspenolic acid                 | 10774324  |    |
|     | Trans-nerolidol                 | 5284507   |    |
|     | 2,4-di-tert-butylphenol         | 7311      |    |
|     | estragole                       | 8815      |    |
|     | p-tyrosol                       | 10393     |    |
|     | hydroxytyrosol                  | 82755     |    |
|     | Sasanquin                       | 5317538   |    |
|     | tannic acid                     | 16129778  |    |
|     | esculetin                       | 5281416   |    |

---

|                                |                        |           |
|--------------------------------|------------------------|-----------|
|                                | cedrusin               | 11210164  |
|                                | glochidioboside        | 24982202  |
|                                | icaraside E4           | 21589939  |
|                                | Isolariciresinol       | 160521    |
|                                | (+)-isoolivil          | 5316262   |
| Forsythiaside (forsythoside A) |                        | 5281773   |
|                                | forsythoside D         | 24721571  |
|                                | forsythoside E         | 69634125  |
|                                | salidroside            | 159278    |
|                                | forsythoside I         | 23958169  |
|                                | calceolarioside A      | 5273566   |
|                                | Suspensaside A         | 132550846 |
|                                | R-suspensaside         | 102228838 |
|                                | S-suspensaside         | 102228839 |
|                                | forsythoside B         | 23928102  |
|                                | forsythoside F         | 6442994   |
|                                | forsythoside G         | 101231533 |
|                                | forsythoside H         | 129449684 |
|                                | calceolarioside B      | 5273567   |
|                                | plantainoside A        | 5320625   |
|                                | plantainoside B        | 9847922   |
|                                | calceolarioside C      | 45360240  |
| Wogonin-7-O-glucoside          |                        | 51136398  |
|                                | Hesperidin             | 10621     |
|                                | Hyperin                | 5281643   |
|                                | taraxasterol acetate   | 13889352  |
|                                | nigaichigoside F1      | 16118969  |
|                                | quadranside IV         | 10372074  |
|                                | esculentic acid        | 9898760   |
|                                | corosolic acid         | 6918774   |
|                                | onjisaponin F          | 10701737  |
|                                | arjunglucoside I       | 14658050  |
|                                | arjunglucoside II      | 52951052  |
|                                | hovenic acid           | 70698002  |
|                                | alphitolic acid        | 12305768  |
|                                | isobauerenyl acetate   | 181096    |
|                                | Ocotillone             | 12313665  |
|                                | garcinielliptone Q     | 102452579 |
|                                | agatholic acid         | 101306703 |
|                                | 3- oxoanticopalic acid | 13858184  |
|                                | haplopappic acid       | 102117108 |
|                                | dehydropinifolic acid  | 22568711  |
|                                | adoxosidic acid        | 13892717  |
|                                | Alpha-thujene          | 17868     |
|                                | sabinene               | 18818     |
|                                | $\gamma$ -terpinene    | 7461      |
|                                | terpinolene            | 11463     |
|                                | (+)-carene             | 442461    |
|                                | $\alpha$ -ocimene      | 5320249   |
|                                | terpinen-4-ol          | 11230     |

---

|     |                  |                                        |           |    |
|-----|------------------|----------------------------------------|-----------|----|
|     |                  | p-cymen-8-ol                           | 14529     |    |
|     |                  | trans-carveol                          | 94221     |    |
|     |                  | (-)-myrtenal                           | 1201529   |    |
|     |                  | cornoside                              | 11809239  |    |
|     |                  | rengyolone                             | 10725564  |    |
|     |                  | forsythenside A                        | 11797786  |    |
|     |                  | forsythenside B                        | 10576163  |    |
|     |                  | Rengyoside B                           | 11045420  |    |
|     |                  | (6S,9R)- roseoside                     | 129316932 |    |
|     |                  | Rengyol                                | 363707    |    |
|     |                  | Rengyoxide                             | 14353410  |    |
|     |                  | rengyoside A                           | 10958239  |    |
|     |                  | rengynic acid                          | 54033324  |    |
|     |                  | Alisol A                               | 15558616  |    |
|     |                  | Alisol B                               | 15558620  |    |
|     |                  | Alisol C                               | 46173914  |    |
|     |                  | Alisol E (epi-alisol A)                | 101297679 |    |
|     |                  | Alisol F                               | 76310822  |    |
|     |                  | Alisol G ( 25-Anhydro-alisol A)        | 76314443  |    |
|     |                  | Alisol O                               | 102004738 |    |
|     |                  | Alisol P                               | 101840124 |    |
|     |                  | Alisol A 23-acetate                    | 70690607  |    |
|     |                  | Alisol B 23-acetate                    | 14036811  |    |
|     |                  | Alisol C 23-acetate                    | 14036813  |    |
|     |                  | Alisol E 23-acetate                    | 101661272 |    |
| 42. | Alisma orientale | Alisol J 23-acetate                    | 100936564 | 98 |
|     | (60)             | Alisol K 23-acetate                    | 100936565 |    |
|     |                  | Alisol L 23-acetate                    | 100936566 |    |
|     |                  | Alisol M 23-acetate                    | 70688546  |    |
|     |                  | Alisol N 23-acetate                    | 100936567 |    |
|     |                  | Alisol A 24-acetate                    | 76336194  |    |
|     |                  | Alismaketone A 23-acetate              | 11800363  |    |
|     |                  | Alismaketone B 23-acetate              | 100941986 |    |
|     |                  | Alismaketone C 23-acetate              | 100941987 |    |
|     |                  | Alismalactone 23-acetate               | 101701562 |    |
|     |                  | Alisolide                              | 101840122 |    |
|     |                  | 11-Deoxy-alisol B 23-acetate           | 101661275 |    |
|     |                  | 11-Deoxy-alisol C 23-acetate           | 101664412 |    |
|     |                  | 13 $\beta$ ,17 $\beta$ -Epoxy-alisol B | 101664542 |    |
|     |                  | 25-Anhydro-alisol A 11-acetate         | 5318945   |    |
|     |                  | 25-Anhydro-alisol F                    | 102004739 |    |
|     |                  | 16-Oxo-alisol A                        | 9983614   |    |
|     |                  | 16,23-Oxido-alisol B                   | 9847547   |    |
|     |                  | 25-O-methyl-alisol A                   | 102004721 |    |
|     |                  | Orientalol E                           | 637282    |    |
|     |                  | Orientalol F                           | 11020886  |    |
|     |                  | Orientalone                            | 11727780  |    |
|     |                  | Sulfoorientalol B                      | 5321551   |    |
|     |                  | Sulfoorientalol C                      | 5321552   |    |
|     |                  | Sulfoorientalol D                      | 146033487 |    |

|  |                                  |           |     |
|--|----------------------------------|-----------|-----|
|  | Alismorientol A                  | 16742799  |     |
|  | Alismorientol B                  | 16742798  |     |
|  | Alismol                          | 5318916   |     |
|  | Alismoxide                       | 10988340  |     |
|  | Clovandiol                       | 76319362  |     |
|  | Germacrene D                     | 5317570   |     |
|  | Germacrene C                     | 25244915  |     |
|  | Oplopanone                       | 10466745  |     |
|  | Oriediterpenol                   | 5320304   |     |
|  | Oriediterpenoside                | 6325764   |     |
|  | Robustaflavone                   | 5281694   |     |
|  | Amentoflavone                    | 5281600   |     |
|  | Calycosin                        | 5280448   |     |
|  | 7-Hydroxy-coumarin               | 5281426   |     |
|  | Emodin                           | 3220      |     |
|  | Falcalindiol                     | 6436239   |     |
|  | Isoimperatorin                   | 68081     |     |
|  | Seselin                          | 68229     |     |
|  | Dulcitol                         | 11850     |     |
|  | Stachyose                        | 439531    |     |
|  | Verbascose                       | 441434    |     |
|  | Manninotriose                    | 5461026   |     |
|  | Verbascotetraose                 | 102273024 |     |
|  | (+)-5-endo-hydroxycamphor        | 9543191   | 99  |
|  | protocatechuic acid methyl ester | 287064    | 99  |
|  | betulabuside A                   | 14484636  | 99  |
|  | hedychiol A                      | 10105633  | 100 |
|  | pygmol                           | 14167388  | 100 |
|  | dihydroyashabushiketol           | 10265808  | 100 |
|  | Tricyclene                       | 79035     | 101 |
|  | o-Cymene                         | 10703     | 101 |
|  | 1,8-Cineole                      | 2758      | 101 |
|  | (E)- $\beta$ -Ocimene            | 5281553   | 101 |
|  | $\alpha$ -Terpinolene            | 11463     | 101 |
|  | Camphor                          | 2537      | 101 |
|  | 2,6-Dimethyl-2,4,6-octatriene    | 5368821   | 101 |
|  | Terpinen-4-ol                    | 11230     | 101 |
|  | Fenchyl acetate                  | 107217    | 101 |
|  | Bornyl acetate                   | 6448      | 101 |
|  | Bicycloelemene                   | 56842786  | 101 |
|  | Dodecamethyl-cyclohexasiloxane   | 10911     | 101 |
|  | $\alpha$ -Cubebene               | 442359    | 101 |
|  | $\beta$ -Cubebene                | 93081     | 101 |
|  | Alpha-Gurjunene                  | 15560276  |     |
|  | Beta-Gurjunene                   | 6450812   |     |
|  | Aromadendrene                    | 91354     |     |
|  | $\gamma$ -Gurjunene              | 15560285  | 101 |
|  | Germacrene D                     | 5317570   |     |
|  | $\alpha$ -Amorphene              | 12306052  |     |
|  | Beta-Selinene                    | 442393    |     |



|     |      |               |                                        |           |     |
|-----|------|---------------|----------------------------------------|-----------|-----|
| 44. | (35) | Areca catechu | Epi-bicyclosquiphellandrene            | 91747125  | 102 |
|     |      |               | Cadina-1,4-diene                       | 6427091   |     |
|     |      |               | Bicyclogermacrene                      | 13894537  |     |
|     |      |               | Endo-1-bourbonanol                     | 12301996  |     |
|     |      |               | $\beta$ -Maaliene                      | 101596917 |     |
|     |      |               | Nerolidol                              | 5284507   |     |
|     |      |               | Spathulenol                            | 92231     |     |
|     |      |               | Caryophyllene oxide                    | 1742210   |     |
|     |      |               | Guaiol                                 | 227829    |     |
|     |      |               | Beta-Himachalene                       | 11586487  |     |
|     |      |               | $\tau$ -Muurolol                       | 51394521  |     |
|     |      |               | Bulnesol                               | 90785     |     |
|     |      |               | Farnesol                               | 445070    |     |
|     |      |               | Farnesyl acetate                       | 94403     |     |
|     |      |               | Benzyl benzoate                        | 2345      |     |
|     |      |               | Benzyl salicylate                      | 8363      |     |
|     |      |               | Arecoline                              | 2230      |     |
|     |      |               | Arecaidine                             | 10355     |     |
|     |      |               | Arecolidine                            | 5319882   |     |
|     |      |               | methyl nicotinate                      | 7151      |     |
|     |      |               | ethyl nicotinate                       | 69188     |     |
|     |      |               | ethyl N-methylpiperidine-3-carboxylate | 97981     |     |
|     |      |               | isoguvacine                            | 3765      |     |
|     |      |               | homoarecoline                          | 34167     |     |
|     |      |               | isorhamnetin                           | 5281654   |     |
|     |      |               | chrysoeriol                            | 5280666   |     |
|     |      |               | liquiritigenin                         | 114829    |     |
|     |      |               | jacareubin                             | 5281644   |     |
|     |      |               | procyanidin A1                         | 9872976   |     |
|     |      |               | procyanidin B1                         | 11250133  |     |
|     |      |               | procyanidin B2                         | 122738    |     |
|     |      |               | arecatannin A1                         | 13752000  |     |
|     |      |               | arecatannin B1                         | 14237657  |     |
|     |      |               | arecatannin C1                         | 9876038   |     |
|     |      |               | arecatannin A2                         | 16142155  |     |
|     |      |               | arecatannin A3                         | 16201011  |     |
|     |      |               | arecatannin B2                         | 71448962  |     |
|     |      |               | ursonic acid                           | 9890209   |     |
|     |      |               | Arborinol                              | 12305177  |     |
|     |      |               | arborinol methyl ether                 | 101600057 |     |
|     |      |               | fernenol                               | 12305178  |     |
|     |      |               | arundoin                               | 12308619  |     |
|     |      |               | cycloartenol                           | 92110     |     |
|     |      |               | chrysophanol                           | 10208     |     |
|     |      |               | physcion                               | 10639     |     |
|     |      |               | p-hydroxybenzoic acid                  | 135       |     |
|     |      |               | epoxyconiferyl alcohol                 | 57403796  |     |
|     |      |               | isovanillic acid                       | 12575     |     |
|     |      |               | de-O-methylasiadiplodin                | 14562693  |     |
|     |      |               | cyclo-(Leu-Tyr)                        | 15550385  |     |

|     |                         |                                      |           |     |
|-----|-------------------------|--------------------------------------|-----------|-----|
| 45. | Cannabis sativa<br>(90) | Cannabisol                           | 102487751 | 103 |
|     |                         | Cannabigerol                         | 5315659   |     |
|     |                         | $\alpha$ -cadinyl-cannabigerolate    | 24862530  |     |
|     |                         | carmagerol                           | 44586785  |     |
|     |                         | Sesquicannabigerol                   | 54669855  |     |
|     |                         | Cannabichromene                      | 30219     |     |
|     |                         | Cannabidiol                          | 644019    |     |
|     |                         | cannabidiolic acid                   | 160570    |     |
|     |                         | cannabidiol monomethyl ether         | 164905    |     |
|     |                         | (-)-cannabidivarin                   | 11601669  |     |
|     |                         | cannabidivarinic acid                | 59444387  |     |
|     |                         | Cannabinodiol                        | 11551346  |     |
|     |                         | cannabielsoic acid A                 | 59444405  |     |
|     |                         | cannabielsoin                        | 162113    |     |
|     |                         | cannabielsoic acid B                 | 59444401  |     |
|     |                         | Cannabicyclol                        | 30607     |     |
|     |                         | cannabicyclolic acid                 | 71437560  |     |
|     |                         | 8-hydroxycannabinolic acid A         | 44139742  |     |
|     |                         | 8-hydroxycannabinol                  | 44241652  |     |
|     |                         | Dehydrocannabifuran                  | 59444381  |     |
|     |                         | Cannabifuran                         | 9966466   |     |
|     |                         | cannabicitran                        | 186149    |     |
|     |                         | cannabicooumaronone                  | 625303    |     |
|     |                         | cannabiripsol                        | 192007    |     |
|     |                         | Cannabimovone                        | 46217279  |     |
|     |                         | cannflavin C                         | 25141335  |     |
|     |                         | chrysoeriol                          | 5280666   |     |
|     |                         | 6-prenylapigenin                     | 10382485  |     |
|     |                         | Docosanoic acid methyl ester         | 13584     |     |
|     |                         | acetyl stigmasterol                  | 129671096 |     |
|     |                         | $\alpha$ -spinasterol                | 5315190   |     |
|     |                         | quebrachitol                         | 151108    |     |
|     |                         | Isocannabispiradienone               | 101802953 |     |
|     |                         | Cannabinol                           | 2543      |     |
|     |                         | Tetrahydrocannabivarin               | 93147     |     |
|     |                         | tetrahydrocannabinolic acid          | 98523     |     |
|     |                         | cannabinolic acid                    | 3081990   |     |
|     |                         | cannabigerolic acid                  | 6449999   |     |
|     |                         | cannabigerolic acid monomethyl ether | 24739091  | 104 |
|     |                         | cannabigerovarinic acid              | 59444383  |     |
|     |                         | cannabigerovarin                     | 59444407  |     |
|     |                         | cannabichromevarin                   | 6451726   |     |
|     |                         | cannabidivarin                       | 11601669  |     |
|     |                         | cannabidiorcol                       | 20586765  |     |
|     |                         | cannabicyclol                        | 30607     |     |
|     |                         | Cannabinolic acid A                  | 3081990   |     |
|     |                         | cannabinol methylether               | 628150    |     |
|     |                         | cannabivarin                         | 622545    |     |
|     |                         | cannabichromanon                     | 25105340  |     |
|     |                         | trigonelline                         | 5570      |     |

|     |      |                                       |           |     |
|-----|------|---------------------------------------|-----------|-----|
|     |      | muscarine                             | 9308      |     |
|     |      | neurine                               | 10042     |     |
|     |      | Piperidine                            | 8082      |     |
|     |      | Hordeine                              | 68313     |     |
|     |      | n-propylamine                         | 7852      |     |
|     |      | n-butylamine                          | 8007      |     |
|     |      | diethylamine                          | 8021      |     |
|     |      | pyrrolidine                           | 31268     |     |
|     |      | Cannabisativine                       | 442846    |     |
|     |      | Alanine                               | 602       |     |
|     |      | galacturonic acid                     | 439215    |     |
|     |      | erythritol                            | 222285    |     |
|     |      | galactitol                            | 11850     |     |
|     |      | ribitol                               | 6912      |     |
|     |      | Malonic acid                          | 867       |     |
|     |      | Phosphoric acid                       | 1004      |     |
|     |      | Pyroglutamic acid                     | 7405      |     |
|     |      | Quinic acid                           | 6508      |     |
|     |      | Behenic acid                          | 633932    |     |
|     |      | Sativic acid                          | 92800     |     |
|     |      | hexyl caproate                        | 22873     |     |
|     |      | campest-4-en-3-one                    | 11988279  |     |
|     |      | camphenhydrate                        | 22155067  |     |
|     |      | carvacrol                             | 10364     |     |
|     |      | carvone                               | 7439      |     |
|     |      | citronellol                           | 8842      |     |
|     |      | dihydrocarveyl acetate                | 30248     |     |
|     |      | dihydrocarvone                        | 24473     |     |
|     |      | pinocarveol                           | 102667    |     |
|     |      | pinocarvone                           | 121719    |     |
|     |      | allo-aromadendrene                    | 42608158  |     |
|     |      | longifolene                           | 289151    |     |
|     |      | nerolidol                             | 5284507   |     |
|     |      | epi-beta-santalene                    | 11106484  |     |
|     |      | vomifoliol                            | 5280462   |     |
|     |      | dihydrovomifoliol                     | 129317062 |     |
|     |      | cannabispiradienone                   | 90475437  |     |
|     |      | beta-cannabispiranol                  | 194174    |     |
|     |      | cannabispirenone                      | 10105874  |     |
|     |      | cannabispirone                        | 162936    |     |
|     |      | canniprene                            | 53439651  |     |
|     |      | orientin                              | 5281675   |     |
|     |      | Carthamin                             | 135565560 |     |
|     |      | Safflor yellow A                      | 71463725  |     |
|     |      | Safflor yellow B                      | 131751452 |     |
|     |      | Saffloflavonesides A                  | 101878345 |     |
|     |      | Saffloflavonesides B                  | 101878346 |     |
| 46. |      | Safflomin A (Hydroxysafflor yellow A) | 6443665   |     |
|     | (35) | Tinctormine                           | 42607657  |     |
|     |      | Safflomin C                           | 42607658  |     |
|     |      |                                       |           | 105 |

|     |       |                                       |           |     |
|-----|-------|---------------------------------------|-----------|-----|
|     |       | Pecarhamin                            | 101928647 |     |
|     |       | Saffloquinoside A                     | 45276863  |     |
|     |       | Saffloquinoside B                     | 101501319 |     |
|     |       | Cartormin                             | 131751684 |     |
|     |       | Anhydrosafflor yellow B               | 102240413 |     |
|     |       | Acacetin 7-O-alpha-L-rhamnopyranoside | 44257896  |     |
|     |       | Luteolin 7-O-beta-D-glucopyranoside   | 13093777  |     |
|     |       | Acacetin                              | 5280442   |     |
|     |       | Isorhamnetin                          | 5281654   |     |
|     |       | Umbelliferone                         | 5281426   |     |
|     |       | Daphnoretin                           | 5281406   |     |
|     |       | N-feruloylserotonin                   | 5969616   |     |
|     |       | N-(p-coumaroyl)serotonin              | 5458879   |     |
|     |       | Serotobenine                          | 11725426  |     |
|     |       | N-feruloyltryptamine                  | 5458878   |     |
|     |       | 1-Tridecene-3,5,7,9,11-pentayne       | 441552    |     |
|     |       | Sinapic acid                          | 637775    |     |
|     |       | Roseoside                             | 9930064   |     |
|     |       | Methylsyringin                        | 131752679 |     |
|     |       | Coniferyl alcohol                     | 1549095   |     |
|     |       | Sinapyl alcohol                       | 5280507   |     |
|     |       | Secoisolariciresinol                  | 65373     |     |
|     |       | Matairesinol                          | 119205    |     |
|     |       | Arctigenin                            | 64981     |     |
|     |       | Trachelogenin                         | 452855    |     |
|     |       | Guaiacol                              | 460       | 106 |
|     |       | Phloroglucinol                        | 359       | 106 |
|     |       | Phenylacetic acid                     | 999       | 106 |
|     |       | Gentisic acid                         | 3469      | 106 |
|     |       | Naringenin Chalcone                   | 5280960   | 106 |
|     |       | Glycitein                             | 5317750   | 106 |
|     |       | Delphinidin                           | 68245     | 106 |
|     |       | Malvidin                              | 159287    | 106 |
|     |       | Allo Ocimene                          | 5368821   | 106 |
| 47. |       | Pinene-2-OL                           | 22013424  | 106 |
|     | (20)  | Linalyl Acetate                       | 8294      | 106 |
|     |       | Elemicin                              | 10248     | 106 |
|     |       | 5-Hexene-2-one                        | 7989      | 107 |
|     |       | Guaiol                                | 227829    | 107 |
|     |       | Benzene-1-butylheptyl                 | 20661     | 107 |
|     |       | Nootkatin                             | 238797    | 107 |
|     |       | 9,17-Octadecadienal                   | 6431297   | 107 |
|     |       | Octadecanoic acid butyl ester         | 31278     | 107 |
|     |       | Tellimagrandin II                     | 151590    |     |
|     |       | Cornusiin A                           | 16129730  |     |
|     |       | Cornusiin B                           | 16131156  |     |
| 48. |       | Cornusiin C                           | 16132407  | 108 |
|     |       | Gemin D                               | 471119    |     |
|     | (105) | Isoterchebin                          | 442685    |     |
|     |       | Tellimagrandin I                      | 442690    |     |

|                                     |           |
|-------------------------------------|-----------|
| Cornusiin G                         | 102061533 |
| Cornusiin D                         | 101826455 |
| Zoomeric acid                       | 445638    |
| Nervonic acid                       | 5281120   |
| Lignoceric acid                     | 11197     |
| Phthalic anhydride                  | 6811      |
| Trans-9-Octadecenoic acid           | 637517    |
| 3, 5-Bis (1, 1-dimethylethyl)phenol | 70825     |
| 4-Methyloctanoic acid               | 62089     |
| 2-Dibenzofuransulfonic acid         | 522803    |
| Morrnionide                         | 11228693  |
| Cornuside                           | 11228694  |
| Loniceroside                        | 179500    |
| Kingiside                           | 12304884  |
| Sweroside                           | 161036    |
| Secoxyloganin                       | 162868    |
| 8-epikingiside                      | 12304886  |
| Secologanoside                      | 14136854  |
| Cornin (Verbenalin)                 | 73467     |
| Hastatoside                         | 92043450  |
| Loganin                             | 87691     |
| Loganic acid                        | 89640     |
| 7-O-methyl-morrnionide              | 127258930 |
| 7-O-ethyl-morrnionide               | 74399180  |
| 10-hydroxycornin                    | 101637374 |
| 10-hydroxyhastatoside               | 100952769 |
| Secologanin                         | 161276    |
| Arjunglucoside II                   | 52951052  |
| Linalyl propionate                  | 61098     |
| 6, 10-Dimethyl-2-undecanone         | 95495     |
| p-Menth-1-ene-7, 8-diol             | 110662    |
| Cubebol                             | 11276107  |
| Tachioside                          | 11962143  |
| 5-hydroxymethyl-2-furfural          | 237332    |
| Glycidol                            | 11164     |
| 3-Vinyl-1-cyclobutene               | 556371    |
| 1,3-Cyclohexadiene                  | 11605     |
| Methacrolein                        | 6562      |
| 2-Vinylfuran                        | 73881     |
| 1-Ethoxypropan-2-yl acetate         | 171378    |
| Pyridine                            | 1049      |
| Pyrrole                             | 8027      |
| 3-Pyrrolidinol                      | 98210     |
| 3-Furaldehyde                       | 10351     |
| 3-Furanmethanol                     | 20449     |
| Propargylamine                      | 239041    |
| Furfural                            | 7362      |
| 2-Furanmethanol                     | 7361      |
| Cis-bicyclo[4.2.0]octane            | 643590    |
| 4-Cyclopentene-1,3-dione            | 70258     |

|                                 |          |     |
|---------------------------------|----------|-----|
| Cyclopent-4-ene-1,3-dione       | 70258    |     |
| 1-Nonene                        | 31285    |     |
| Pentanoic acid                  | 7991     |     |
| 2-Formylhistamine               | 541600   |     |
| 2(5H)-Furanone                  | 10341    |     |
| 2-Cyclohexen-1-one              | 13594    |     |
| 1-Methylpyrazol-3-amine         | 137254   |     |
| 2H-Pyran-2-one                  | 68154    |     |
| 1H-Pyrrole-2-carboxaldehyde     | 13854    |     |
| 4-Methyl-5H-furan-2-one         | 145832   |     |
| p-Cresol                        | 2879     |     |
| 2-Pentyne                       | 12310    |     |
| Maltol                          | 8369     |     |
| Benzyl nitrile                  | 8794     |     |
| Dehydromevalonic lactone        | 557445   |     |
| E-7-Tetradecenol                | 5362726  |     |
| Creosol                         | 7144     |     |
| Catechol                        | 289      |     |
| 5-Hydroxymethylfurfural         | 237332   |     |
| 2-Coumaranone                   | 68382    |     |
| 4,6-Dioxadodecane               | 57645665 |     |
| 1-Tridecene                     | 17095    |     |
| Kessane                         | 11310616 |     |
| Oxaceprol                       | 65784    |     |
| 2-Methoxy-4-vinylphenol         | 332      |     |
| 1,2,3-Benzenetriol              | 1057     |     |
| 1,2,4-Benzenetriol              | 10787    |     |
| 3,4-Dimethyl-o-phenylenediamine | 521077   |     |
| 3,5-Dimethoxy-4-hydroxytoluene  | 240925   |     |
| 4-Methoxycinnamaldehyde         | 641294   |     |
| D-Allose                        | 439507   |     |
| 1-Pentadecene                   | 25913    |     |
| Pentadecane                     | 12391    |     |
| Cyclotetradecane                | 67524    |     |
| Butyrovannillone                | 14035098 |     |
| Palmitoleic acid                | 445638   |     |
| Tridecanoic acid                | 12530    |     |
| 1-Heptadecene                   | 23217    | 109 |
| 9-Hexadecenoic acid             | 5282745  |     |
| 5-Amino-2-thiocyanoacetophenone | 284762   |     |
| Cyanoacetic acid, dodecyl ester | 12606407 |     |
| 1,5-Dodecadiene                 | 5363382  |     |
| cis-1-Chloro-9-octadecene       | 5367784  |     |
| 1-Nonadecene                    | 29075    |     |
| 1-Octadecene                    | 8217     |     |
| Methyl 13-methyl-eicosanoate    | 85964992 |     |
| Tricosane                       | 12534    |     |
| Oxacycloheptadecan-2-one        | 7984     |     |
| 1-Docosene                      | 74138    |     |

|     |                           |                                           |           |     |
|-----|---------------------------|-------------------------------------------|-----------|-----|
| 49. | Eucommia ulmoides<br>(55) | (-)-olivil                                | 5273570   | 110 |
|     |                           | Lariciresinol                             | 332427    |     |
|     |                           | Balanophonin                              | 23252258  |     |
|     |                           | vladinol D                                | 70698172  |     |
|     |                           | (+)-cyclo-olivil                          | 5316262   |     |
|     |                           | (+)-medioresinol                          | 181681    |     |
|     |                           | (+)-pinoresinol                           | 73399     |     |
|     |                           | (+)-syringaresinol                        | 443023    |     |
|     |                           | (+)-epipinoresinol                        | 637584    |     |
|     |                           | Arctiin                                   | 100528    |     |
|     |                           | citrusin B                                | 131752580 |     |
|     |                           | threo-dihydroxydehydrodiconiferyl alcohol | 5317204   |     |
|     |                           | hedyotol C                                | 21636185  |     |
|     |                           | genipin                                   | 442424    |     |
|     |                           | aucubin                                   | 91458     |     |
|     |                           | geniposide                                | 107848    |     |
|     |                           | geniposidic acid                          | 443354    |     |
|     |                           | asperulosidic acid                        | 11968867  |     |
|     |                           | asperulosidic acid ethyl ester            | 21580986  |     |
|     |                           | Ajugoside                                 | 9865184   |     |
|     |                           | Reptoside                                 | 44584096  |     |
|     |                           | eucommiol                                 | 154373    |     |
|     |                           | eucommioside II                           | 6325167   |     |
|     |                           | 1-deoxyeucommiol                          | 5316559   |     |
|     |                           | Epieucommiol                              | 101714787 |     |
|     |                           | ulmoidoside A                             | 14540382  |     |
|     |                           | ulmoidoside B                             | 14540384  |     |
|     |                           | asperuloside                              | 84298     | 110 |
|     |                           | ulmoside                                  | 11968295  |     |
|     |                           | eucomoside A                              | 102382672 |     |
|     |                           | eucomoside B                              | 23624546  |     |
|     |                           | eucomoside C                              | 23625086  |     |
|     |                           | daphylloside                              | 21602024  |     |
|     |                           | scandoside methyl ester                   | 442433    |     |
|     |                           | loganin                                   | 87691     |     |
|     |                           | 7-epi-loganin                             | 10548420  |     |
|     |                           | artselaenin C                             | 100930978 |     |
|     |                           | harpagide                                 | 10044294  |     |
|     |                           | catalpol                                  | 91520     |     |
|     |                           | avicularin                                | 5490064   |     |
|     |                           | oroxylin A                                | 5320315   |     |
|     |                           | licochalcone A                            | 5318998   |     |
|     |                           | thunberginol C                            | 10333412  |     |
|     |                           | C-veratrolylglycol                        | 15765124  |     |
|     |                           | alternariol                               | 5359485   |     |
|     |                           | salicifoliol                              | 10955962  |     |
|     |                           | eucophenoside                             | 102044905 |     |
|     |                           | Uvaol                                     | 92802     |     |
|     |                           | eleganoside A                             | 101085911 |     |
|     |                           | borreriagenin                             | 44583980  |     |

|     |                            |                                     |           |     |
|-----|----------------------------|-------------------------------------|-----------|-----|
| 50. | Foeniculum vulgare<br>(55) | 3-O-acetylerythrodil                | 118796402 | 111 |
|     |                            | aplyolide D                         | 10708956  |     |
|     |                            | Umbelliferone                       | 5281426   |     |
|     |                            | Eriodictyol                         | 440735    |     |
|     |                            | Homoeriodictyol                     | 73635     |     |
|     |                            | Aromadendrol                        | 122850    |     |
|     |                            | cyclo(Pro-Pro)                      | 529063    |     |
|     |                            | Anisketone                          | 31231     | 112 |
|     |                            | Apiol                               | 10659     |     |
|     |                            | 4-Carene                            | 530422    |     |
|     |                            | 3-Carene                            | 26049     |     |
|     |                            | Cathine                             | 441457    |     |
|     |                            | 2-Propyn-1-ol                       | 7859      |     |
|     |                            | 2,6-Dimethyl-2,4,6-octatriene       | 5368821   |     |
|     |                            | Sabinene hydrate                    | 62367     |     |
|     |                            | Fenchyl acetate                     | 107217    |     |
|     |                            | Dicyclopropyl carbinol              | 84336     |     |
|     |                            | Estragole                           | 8815      |     |
|     |                            | <i>trans</i> -p-2,8-menthadien-1-ol | 155626    |     |
|     |                            | 1,4-Dimethoxybenzene                | 9016      |     |
|     |                            | <i>trans</i> -Anethole              | 637563    |     |
|     |                            | Allantoic acid                      | 203       |     |
|     |                            | 1-Undecanol                         | 8184      |     |
|     |                            | Benzothiazole                       | 7222      |     |
|     |                            | 1,6-Hexanediol                      | 12374     |     |
|     |                            | Mephnesin                           | 4059      |     |
|     |                            | 4-Fluorohistamine                   | 541569    |     |
|     |                            | 1-(3-Methoxyphenyl)-1-propanone     | 584765    |     |
|     |                            | 1,5 dicaffeoylquinic acid           | 122685    | 113 |
|     |                            | Hesperidin                          | 10621     |     |
|     |                            | 3- caffeoylquinic acid              | 102111217 |     |
|     |                            | 4- caffeoylquinic acid              | 9798666   |     |
|     |                            | imperatorin                         | 10212     |     |
|     |                            | psoralen                            | 6199      |     |
|     |                            | bergapten                           | 2355      |     |
|     |                            | xanthotoxin                         | 4114      |     |
|     |                            | isopimpinellin                      | 68079     |     |
|     |                            | Cuminal                             | 326       |     |
|     |                            | cis-Anethole                        | 1549040   |     |
|     |                            | p-Anisaldehyde                      | 31244     |     |
|     |                            | 2-methyl-3-oxoestran- 17-yl acetate | 22212600  |     |
|     |                            | Vetivenene                          | 529892    |     |
|     |                            | Anthracene                          | 8418      |     |
|     |                            | 2-Methoxy-4-ethylphenol             | 62465     |     |
|     |                            | 1,2-Dimethoxy-4-methylbenzene       | 68126     |     |
|     |                            | Cedran-9-one                        | 21723990  |     |
|     |                            | 2,2-dimethyl-3-phenylpropanoate     | 6947002   |     |
|     |                            | 3,3,6-Trimethyl-1-indanone          | 594538    |     |
|     |                            | o-Benzenedicarboxylic acid          | 1017      |     |
|     |                            | 3,4-Dimethyl-1,5-cyclooctadiene     | 5365753   |     |



---

|                       |          |
|-----------------------|----------|
| capric acid           | 2969     |
| undecanoic acid       | 8180     |
| pentadecadienoic acid | 19047235 |
| erucic acid           | 5281116  |
| n-Hexacosane          | 12407    |
| n-Heptacosane         | 11636    |
| n-Octacosane          | 12408    |
| n-Nonacosane          | 12409    |
| n-Triacontane         | 12535    |
| n-Dotriacontane       | 11008    |
| n-Tetratriacontane    | 26519    |
| n-Hexatriacontane     | 12412    |
| n-Octatriacontane     | 23599    |
| n-Tetracontane        | 20149    |

---

## References:

1. [Anti-inflammatory and PPAR transactivational effects of secondary metabolites from the roots of \*Asarum sieboldii\*](#)
2. Fumigant Toxicity of Phenylpropanoids Identified in *Asarum sieboldii* Aerial Parts to *Lycoriella ingenua* (Diptera: Sciaridae) and *Coboldia fuscipes* (Diptera: Scatopsidae)
3. The Genus *Asarum* L.: A Phytochemical and Ethnopharmacological Review
4. [Scutellaria baicalensis](#) Georgi. (Lamiaceae): a review of its traditional uses, botany, phytochemistry, pharmacology and toxicology
5. *Cinnamomum cassia* Presl: A Review of Its Traditional Uses, Phytochemistry, Pharmacology and Toxicology
6. [Antiinflammatory effects of essential oil from the leaves of \*Cinnamomum cassia\* and cinnamaldehyde on lipopolysaccharide-stimulated J774A. 1 cells](#)
7. [Analysis and evaluation of essential oil components of cinnamon barks using GC–MS and FTIR spectroscopy](#)
8. [Anti-diabetic nephropathy compounds from \*Cinnamomum cassia\*](#)
9. [Five new diterpenoids from the barks of \*Cinnamomum cassia\* \(L.\) J. Presl](#)
10. [Diterpenoids with Immunosuppressive Activities from \*Cinnamomum cassia\*](#)
11. [Chemical composition and tyrosinase inhibitory activity of \*Cinnamomum cassia\* essential oil](#)
12. [Differentiating parts of \*Cinnamomum cassia\* using LC-qTOF-MS in conjunction with principal component analysis](#)
13. [Xanthine oxidase inhibitory activity of constituents of \*Cinnamomum cassia\* twigs](#)
14. [Tissue-specific chemical profiling and quantitative analysis of bioactive components of \*Cinnamomum cassia\* by combining laser-microdissection with UPLC-Q ...](#)
15. [Two new geranylphenylacetate glycosides from the barks of \*Cinnamomum cassia\*](#)
16. [Nitric oxide inhibitory constituents from the barks of \*Cinnamomum cassia\*](#)
17. [Identification of compounds from the water soluble extract of \*Cinnamomum cassia\* barks and their inhibitory effects against high-glucose-induced mesangial cells](#)
18. [A New Lactone from the Twigs of \*Cinnamomum cassia\*](#)
19. [Bioactive Constituents of \*Glycyrrhiza uralensis\* \(Licorice\): Discovery of the Effective Components of a Traditional Herbal Medicine](#)
20. Studies on chemical constituents on roots of *Glycyrrhiza uralensis*
21. Recent Advances in *Astragalus membranaceus* Anti-Diabetic Research: Pharmacological Effects of Its Phytochemical Constituents
22. Phellodendri Cortex: A Phytochemical, Pharmacological, and Pharmacokinetic Review
23. Enzyme-assisted Extraction of Bioactive Phytochemicals from Japanese Peppermint (*Mentha arvensis* L. cv. 'Hokuto')
24. Chemical Constituents from the Aerial Parts of *Bupleurum falcatum* L. and Biological Evidences
25. Chemical constituents analysis on the seeds of *Bupleurum Falcatum* L.
26. A Pharmacological Review of Bioactive Constituents of *Paeonia lactiflora* Pallas and *Paeonia veitchii* Lynch
27. Platelet anti-aggregatory and blood anti-coagulant effects of compounds isolated from *Paeonia lactiflora* and *Paeonia suffruticosa*
28. Pharmacological effects of medicinal components of *Atractylodes lancea* (Thunb.) DC.
29. *Atractylodis Rhizoma*: A review of its traditional uses, phytochemistry, pharmacology, toxicology and quality control
30. Chemical Constituents from *Cimicifuga dahurica* and Their Anti-Proliferative Effects on MCF-7 Breast Cancer Cells
31. Traditional uses, phytochemistry, pharmacology and toxicology of the genus *Cimicifuga*: A review

32. Assessment of phenolics contents and antioxidant properties in *Cimicifuga dahurica* (Turcz.) Maxim during drying process
33. Anti-inflammatory activity of compounds from the rhizome of *Cnidium officinale*
34. Chemical constituents from lipophilic parts in roots of *Angelica dahurica* var. *formosana* cv. Chuanbaizhi
35. Coumarins from the roots of *Angelica dahurica* cause anti-allergic inflammation
36. Composition and stereochemistry of ephedrine alkaloids accumulation in *Ephedra sinica* Stapf
37. A-Type Proanthocyanidins from the Stems of *Ephedra sinica* (Ephedraceae) and Their Antimicrobial Activities
38. Phytochemistry and pharmacology of genus *Ephedra*
39. Chemical Constituents from Seeds of *Panax ginseng*: Structure of New Dammarane-Type Triterpene Ketone, Panaxadione, and HPLC Comparisons of Seeds and Flesh
40. The Chemical Constituents of Ginseng Plants
41. Some phytochemical, pharmacological and toxicological properties of ginger (*Zingiber officinale* Roscoe): A review of recent research
42. PHYCHEMISTRY, PHYTOCHEMICAL, PHARMACOLOGICAL AND MOLECULAR STUDY OF ZINGIBER OFFICINALE ROSCOE: A REVIEW
43. Plants of the Genus *Zingiber* as a Source of Bioactive Phytochemicals: From Tradition to Pharmacy
44. Phytochemical and chemotaxonomic study of *Poria cocos* (Schw.) Wolf
45. Chemical Constituents and Pharmacological Properties of *Poria cocos*
46. Phytochemical variation among the traditional Chinese medicine Mu Dan Pi from *Paeonia suffruticosa* (tree peony)
47. Studies on Chemical Constituents from Seeds of *Paeonia suffruticosa* Andr.
48. Chemical constituents, antibacterial activity and mechanism of *Paeonia suffruticosa* Andr. buds extract against *Staphylococcus aureus* and *Escherichia coli* O157:H7
49. Origins, Phytochemistry, Pharmacology, Analytical Methods and Safety of Cortex Moutan (*Paeonia suffruticosa* Andrew): A Systematic Review
50. Chemical constituents of lateral roots of *Aconitum carmichaelii* Debx
51. A review on phytochemistry and pharmacological activities of the processed lateral root of *Aconitum carmichaelii* Debeaux
52. Comparative Analysis of the Major Chemical Constituents in *Salvia miltiorrhiza* Roots, Stems, Leaves and Flowers during Different Growth Periods by UPLC-TQ-MS/MS and HPLC-ELSD Methods
53. *Salvia miltiorrhiza*: Chemical and pharmacological review of a medicinal plant
54. Bioactive phytochemicals from shoots and roots of *Salvia* species
55. Major Phytochemical Composition of 3 Native Korean Citrus Varieties and Bioactive Activity on V79-4 Cells Induced by Oxidative Stress
56. Phenolic Compounds and Antioxidant Activity of Extracts from Ultrasonic Treatment of Satsuma Mandarin (*Citrus unshiu* Marc.) Peels
57. Flavonoids and a Limonoid from the Fruits of *Citrus unshiu* and Their Biological Activity
58. Semi-Continuous Subcritical Water Extraction of Flavonoids from *Citrus unshiu* Peel: Their Antioxidant and Enzyme Inhibitory Activities
59. Chemical Composition and Anti-inflammation Activity of Essential Oils from *Citrus unshiu* Flower
60. Phytochemistry, Pharmacological Activities and Intellectual Property Landscape of *Gardenia jasminoides* Ellis: a Review
61. Chemical Study on Aerial Parts of *Gentiana scabra*.
62. The anti-inflammatory secoiridoid glycosides from *Gentianae Scabrae Radix*: the root and rhizome of *Gentiana scabra*
63. Triterpenoids isolated from the rhizomes and roots of *Gentiana scabra* and their inhibition of indoleamine 2,3-dioxygenase
64. A review of the phytochemistry and pharmacological activities of *Magnoliae officinalis* cortex
65. *Ophiopogon japonicus*—A phytochemical, ethnomedicinal and pharmacological review
66. Rapid Screening and Identification of Chemical Constituents From *Ophiopogon japonicus* by High-Performance Liquid Chromatography Coupled to Electrospray Ionization and Quadrupole Time-of-Flight Mass Spectrometry
67. Ethnomedicinal, Phytochemical and Pharmacological Investigations of *Perilla frutescens* (L.) Britt.
68. Isolation of Phenolics, Nucleosides, Saccharides and an Alkaloid from the root of *Aralia cordata*
69. Inhibitory Constituents against Cyclooxygenases from *Aralia cordata* Thunb
70. Quantitative Determination of Diterpenoids from the Roots of *Aralia cordata*
71. Comprehensive profiling and characterization of chemical constituents of rhizome of *Anemarrhena asphodeloides* Bge.
72. Anti-Inflammatory Activities of Compounds Isolated from the Rhizome of *Anemarrhena asphodeloides*
73. The genus *Anemarrhena* Bunge: A review on ethnopharmacology, phytochemistry and pharmacology
74. A review of the pharmacological effects of *Arctium lappa* (burdock)
75. Inhibitory Compounds of  $\alpha$ -Glucosidase Activity from *Arctium lappa* L.
76. Analysis of Seasonal Variations of the Volatile Constituents in *Artemisia princeps* (Japanese Mugwort) Leaves by Metabolomic Approach
77. Chemical constituents from the tubers of *Pinellia ternata* (Araceae) and their chemotaxonomic interest
78. The ethnobotanical, phytochemical and pharmacological profile of the genus *Pinellia*

79. Platycodon grandiflorus – An Ethnopharmacological, phytochemical and pharmacological review
80. The Pharmacological Effects and Health Benefits of Platycodon grandiflorus—A Medicine Food Homology Species
81. A new megastigmane from fresh roots of *Rehmannia glutinosa*
82. Phytochemical Studies on *Rehmanniae Radix*
83. Phytochemical studies of *Rehmannia glutinosa* rhizomes
84. Chemical constituents from *Rehmannia glutinosa*
85. Study on Chemical Constituents of Immunosuppressive Parts from the Roots of *Rehmannia glutinosa*
86. *Saposhnikovia divaricata*—An Ethnopharmacological, Phytochemical and Pharmacological Review
87. Studies on chemical constituents on roots of *Glycyrrhiza uralensis*
88. ZIZIPHUS JUJUBA: A PHYTOPHARMACOLOGICAL REVIEW
89. Chemical characterization of the main bioactive constituents from fruits of *Ziziphus jujuba*
90. *Ziziphus jujuba* Mill., a plant used as medicinal food: a review of its phytochemistry, pharmacology, quality control and future research
91. A Promising View of Kudzu Plant, *Pueraria montana* var. *lobata* (Willd.) Sanjappa & Pradeep: Flavonoid Phytochemical Compounds, Taxonomic Data, Traditional Uses and Potential Biological Activities for Future Cosmetic Application
92. Chemical constituents from roots of *Pueraria lobata*
93. Phytochemistry and health promoting effects of Job's tears (*Coix lacryma jobi*) - A critical review
94. Phytochemical Screening and Antibacterial Activity *Coix lacryma-jobi* Oil
95. Chemistry, pharmacology and processing method of rhubarb (*Rheum* species): a review
96. Medicinal uses, phytochemistry and pharmacology of the genus *Uncaria*
97. Phytochemistry, pharmacology, quality control and future research of *Forsythia suspensa* (Thunb.) Vahl: A review
98. *Alisma orientale*: Ethnopharmacology, Phytochemistry and Pharmacology of an Important Traditional Chinese Medicine
99. Phytochemical Constituents of *Amomum xanthioides*
100. Terpene Glycosides and Cytotoxic Constituents from the Seeds of *Amomum xanthioides*
101. Chemical Composition of Essential Oil of *Amomum xanthioides* Wall. ex Baker from Northern Vietnam
102. *Areca catechu* L. (Arecaceae): A review of its traditional uses, botany, phytochemistry, pharmacology and toxicology
103. Phytochemistry of *Cannabis sativa* L.
104. CONSTITUENTS OF *CAS-TABIS SATIVA* L. XT'II. A REVIEW OF THE XXTURXL CONSTITUENTS
105. Phytochemistry and Pharmacology of *Carthamus tinctorius* L.
106. Phytochemical Screening and Antimicrobial Evaluation of *Syzygium aromaticum* Extract and Essential oil
107. Chemical Constituents of Clove (*Syzygium aromaticum*, Fam. Myrtaceae) and their Antioxidant Activity
108. Ethnopharmacology, phytochemistry, and pharmacology of *Cornus officinalis* Sieb. et Zucc
109. Molecules and functions of *Cornus officinalis* bark volatiles
110. Ethnobotany, Phytochemistry and Pharmacological Properties of *Eucommia ulmoides*: A Review
111. Phytochemical constituents, chemotaxonomic significance and anti-arthritic effect of *Eucommia ulmoides* Oliver staminate flowers
112. *Foeniculum vulgare* Mill: A Review of Its Botany, Phytochemistry, Pharmacology, Contemporary Application, and Toxicology
113. The chemical constituents and pharmacological effects of *Foeniculum vulgare* - A review
